## **Does insulin signalling decide glucose levels in the fasting steady state?**

Manawa Diwekar-Joshi<sup>1</sup>

Milind Watve<sup>1,2\*</sup>

1. Indian Institute of Science Education and Research, Pune, India

2. Deenanath Mangeshkar Hospital and Research Centre, Pune, India

\*for correspondence:

Keywords: physiology, steady-state, glucose homeostasis, causality

## ***Abstract***

Recent work has suggested that altered insulin signalling may not be central to the pathophysiology of type 2 diabetes as classically believed. We critically re-examine the role of insulin in glucose homeostasis using five different approaches (i) systematic review and meta-analysis of tissue specific insulin receptor knock-outs, (ii) systematic review and meta-analysis of insulin suppression and insulin enhancement experiments, (iii) differentiating steady-state and post-meal state glucose levels in streptozotocin treated rats in primary experiments (iv) mathematical and theoretical considerations and (v) glucose insulin relationship in human epidemiological data. All the approaches converge on the inference that although insulin action hastens the return to a steady-state after a glucose load, there is no evidence that insulin action determines the steady-state level of glucose. The inability to differentiate steady state causality from perturbed state causality has led to misinterpretation of the evidence for the role of insulin in glucose regulation.

## ***Key words***

Causality, glucose homeostasis, insulin, steady-state, type 2 diabetes

1 ***1. Introduction***

2

3 ***Why is insulin believed to regulate fasting blood sugar: A burden of history?***

4 After the classical demonstration by Claud Bernard that damage to medulla oblongata causes  
5 hyperglycaemia (1), the second major breakthrough was the demonstration by von Mering  
6 and Minkowski that pancreatectomy resulted in hyperglycaemia (2) and further that  
7 pancreatic extracts resulted in lowering of plasma glucose. The active principle eventually  
8 purified became known as insulin (3). The discovery and success of insulin in treating  
9 diabetes was so overwhelming that insulin became the key molecule in glucose homeostasis  
10 and the role of brain and other mechanisms were practically forgotten. It should be noted that  
11 the prevalent type of diabetes then was what we would call type 1 diabetes (T1D) today in  
12 which there is almost complete destruction of pancreatic  $\beta$ -cells. The distinction between type  
13 1 and 2 developed gradually over the next five decades along with the realization that insulin  
14 levels may be normal or raised in type 2 diabetes (T2D) and that a substantial population of  
15  $\beta$ -cells survives lifelong (4–6). However, by now the thinking about glucose homeostasis was  
16 so insulin centred, that the inability of normal or raised levels of insulin to keep plasma  
17 glucose normal was labelled as “insulin resistance” without adequately examining and  
18 eliminating alternative possibilities and the concept got wide uncritical acceptance. Although  
19 insulin resistance as a phenomenon is well established and its molecular mechanisms  
20 elucidated with substantial details, the question whether altered insulin signalling is solely or  
21 mainly responsible for fasting hyperglycaemia of T2D, or other insulin independent  
22 mechanisms play a significant role is not clearly answered.

23

24 There are multiple reasons to doubt and re-examine the role of insulin in glucose regulation  
25 in relation to T2D (7–9). Exogenous insulin and other insulin-centred lines of treatment have

26 largely failed to reduce diabetic complications and mortality in T2D although short term  
27 glucose lowering may be achieved (10–15). In the long run even the glucose normalization  
28 goal is not achieved in majority of cases (12,14). A number of mechanisms are known to  
29 influence glucose dynamics, partially or completely independent of insulin signalling,  
30 including autonomic signals (16,17), glucocorticoids (18–21), insulin independent glucose  
31 transporters (22) and certain other hormones and growth factors (23–26). Analysis of multi-  
32 organ signalling network models have also raised doubts about the central role of insulin and  
33 insulin resistance in T2D (27).

34

35 The definitions as well as clinical measures of insulin resistance are such that the effects of  
36 all other mechanisms are accounted for under the name of “insulin resistance”. For example,  
37 the HOMA-IR index is calculated as a product of fasting glucose and fasting insulin (28,29).  
38 The belief that this product reflects insulin resistance is necessarily based on the assumption  
39 that insulin signalling alone quantitatively determines glucose level in a fasting steady state.  
40 The assumption has seldom been critically examined. If any other mechanisms are  
41 contributing to raised fasting glucose levels, they will be included in the HOMA-IR index  
42 going by the way it is calculated and would be labelled as insulin resistance. We have  
43 previously showed using mathematical and statistical tools of causal analysis (30) that the  
44 classical pathway of obesity induced insulin resistance leading to a hyperinsulinemic  
45 normoglycemic prediabetic state and the faithfulness of HOMA indices in measuring insulin  
46 resistance cannot be simultaneously true. Either the HOMA indices do not represent insulin  
47 resistance faithfully or the classically believed pathway of compensatory insulin response  
48 leading to hyperinsulinemic normoglycemic state is wrong according to this analysis (30).

49

50 We examine here the long held belief that altered insulin signalling is responsible for fasting  
51 as well as post prandial hyperglycemia in T2D using five different approaches (i) Systematic  
52 review and meta-analysis of experiments involving tissue specific insulin receptor knock-outs  
53 (IRKOs) (ii) Systematic review and meta-analysis of experiments to chronically raise or  
54 lower insulin levels (iii) Primary experiments on streptozotocin (STZ) induced  
55 hyperglycaemia in rats that differentiate between steady and perturbed-state (iv) Examining  
56 the insulin resistance hypothesis for being mathematically possible and theoretically sound  
57 (v) Analysis of insulin-glucose relationship in steady-state versus post-meal perturbed-state in  
58 human epidemiological data for testing the predictions of mathematical models. The first  
59 three approaches have the advantage of using specific molecular interventions where the  
60 target is precisely known. For the meta-analyses we chose mechanisms of insulin level/action  
61 modification which have been used extensively and have been reproduced by multiple labs  
62 world over. The possible disadvantage is that they are mostly animal experiments and doubts  
63 are expressed about whether the results are directly relevant to humans (31–33). However,  
64 some of the experiments reported are human and they converge with the inferences of the  
65 animal experiments. In the last two approaches, human epidemiological data are used in  
66 which the experimental molecular precision is not expected, but we test certain specific  
67 predictions of the insulin resistance hypotheses using novel analytical approaches and  
68 examine whether they converge on similar inferences. The convergence of human and animal  
69 data is important to reach robust conclusions.

70

71 **2. Systematic review and meta-analysis of experiments involving tissue specific insulin**  
72 **receptor knock-outs**

73

74 The first step in insulin signalling is the binding of insulin to insulin receptor (34). The  
75 downstream actions of this event finally lead to insulin-dependent glucose uptake in insulin  
76 dependent tissues of the body. Experimentally, disruption of insulin signalling is achieved by  
77 knocking out or inhibiting various players in the signalling cascade. We chose to look at the  
78 effects of knocking out the tissue specific insulin receptor on fasting and post-meal or post  
79 glucose load levels in rodent models. Studying tissue specific insulin receptor knockouts  
80 enables us to differentiate between the roles of insulin signalling in different tissues. A  
81 classical belief is that the post-meal glucose curve is mainly influenced by the rate of glucose  
82 uptake by tissues, mainly muscle, whereas the fasting glucose levels are mainly determined  
83 by the rate of liver glucose production (35). If this belief is true one expects that muscle  
84 specific knockout would mainly affect the GTT curve but may not affect fasting glucose  
85 level, whereas liver specific knockout would mainly affect the fasting glucose level.

86

87 **2.1. Methods**

88

89 The details of the systematic literature review are given in table 1. The details of the  
90 experiments of the shortlisted studies can be seen in the table 1 of the supplementary  
91 information 1 which shows that similar methods have been utilised to create the knockouts  
92 and therefore a comparative analysis is justified.

93

94 **Table 1:** Systematic literature review for studies on tissue specific insulin receptor knockouts (meta-analysis 1).

| <b>Meta-analysis 1</b> →                                                                                                                | <b>Insulin receptor knockout</b>                                                                                                               |
|-----------------------------------------------------------------------------------------------------------------------------------------|------------------------------------------------------------------------------------------------------------------------------------------------|
| <b>Task performed</b> ↓                                                                                                                 |                                                                                                                                                |
| Key word(s) used for the first search on the PubMed/MEDLINE data-base                                                                   | “insulin receptor knockout”                                                                                                                    |
| Number of hits in the first search                                                                                                      | 78                                                                                                                                             |
| Inclusion criteria for primary screening                                                                                                | Study showing experiments with IRKOs in which GTT curve has been reported                                                                      |
| Number of papers shortlisted based on primary screening                                                                                 | 36                                                                                                                                             |
| Inclusion criteria for secondary screening                                                                                              | Study showing similar methods of making the insulin receptor knockout; had fasting and post glucose bolus readings of the control and knockout |
| Number of papers shortlisted based on screening the full-text and back referencing (data for meta-analysis extracted from these papers) | 16                                                                                                                                             |
| List of publications used in the final meta-analysis: references numbers                                                                | (36–51)                                                                                                                                        |

95

96 **2.1.1 Statistical approach for meta-analysis:** Although we short-listed papers that used  
 97 similar methods, small differences in protocols can make considerable differences. As the  
 98 results will reveal, there is substantial variation in results across studies. Therefore we use  
 99 non-parametric methods for analysing the pooled data. We first look at in how many of the  
 100 experiments the treatment mean is greater than the control mean and in how many it is less. If

101 this difference is significant, we conclude that there is sufficient qualitative consistency  
102 across experiments to reach a reliable inference. If there is a consistent direction of  
103 difference, we look at how many are individually significant. As a conservative approach we  
104 avoid pooling data quantitatively since across studies there are differences in age or weight of  
105 animals, number of days after treatment, number of hours of fasting and other variables. This  
106 approach is maintained throughout all meta-analyses reported.

107

## 108 ***2.2 Results of the IRKO meta-analysis***

109

110 We shortlisted 16 papers with 46 independent experiments in which glucose tolerance curves  
111 of insulin receptor knockouts and controls were compared (table 1 of supplementary  
112 information 1). The experiments could be segregated in four different tissue specific  
113 knockouts for the analysis: Liver insulin receptor knockout (LIRKO), Muscle insulin receptor  
114 knockout (MIRKO), fat/adipose insulin receptor knockout (FIRKO) and  $\beta$ -cell insulin  
115 receptor knockout ( $\beta$ IRKO). A generalized trend in the total picture summed up over all four  
116 IRKOs seen in the meta-analysis was that along the GTT curve, significantly higher glucose  
117 levels are seen in the knockouts as compared to the controls, particularly and consistently at  
118 30, 60 and 120 minutes. However, the fasting glucose level was not significantly different in  
119 the meta-analysis. In some studies, fasting glucose was significantly greater in the knockouts  
120 than the controls, however in some other studies it is significantly lower as well. In 29 out of  
121 46 experiments there was no significant difference (Table 2) in the fasting glucose levels of  
122 knockouts and controls. This trend was consistently seen in MIRKO, LIRKO and  $\beta$ IRKO.  
123 Only in FIRKO there were greater number of studies showing fasting glucose significantly  
124 higher in the knockouts than in the controls, but in the non-parametric meta-analysis the trend  
125 was not significant. Also, only in FIRKO, the 30, 60- and 120-minute glucose was not



126 significantly different in the knockouts than the controls. It is notable in particular that in  
127 none of LIRKO experiments the fasting sugar was significantly higher than the controls. This  
128 contradicts the classical belief that liver insulin resistance is mainly responsible for fasting  
129 hyperglycaemia in T2D (35,52).

130

131 A possible problem in comparing fasting glucose across different studies was that different  
132 fasting intervals have been used ranging from 4 to 16 hours. No study clearly reported how  
133 much time is required to reach a steady-state in a knockout. In 10 of the experiments in which  
134 fasting time was reported as 16 hours, none had fasting sugar significantly different for  
135 controls. In the 13 experiments in which it was high, the fasting duration was between 4 to  
136 12 hours or not precisely reported. Therefore, it is likely that in some of the experiments,  
137 glucose steady-state was not yet achieved at the time point defined as fasting. This bias  
138 increases the probability that higher fasting glucose is reported for the knockouts. However,  
139 since we do not see a significant difference in the meta-analysis, the inference that IRKO  
140 does not alter fasting glucose is unlikely to be a result of the bias. In fact, any possible  
141 correction to the bias might further reduce the apparent residual difference. Therefore, in  
142 spite of some inconsistency across studies, a robust generalization is that IRKOs have  
143 significantly increased plasma glucose over controls at 30 to 120 minutes post glucose load  
144 but they do not appear to affect steady-state fasting glucose. The time required to reach the  
145 steady state is nevertheless increased.

146

147 **Table 2:** Meta-analysis of the fasting and post-feeding glucose levels in the control and IRKOs. The table  
148 shows, out of the total number of experiments used for the analysis, in how many the mean of the knockouts (T)  
149 was greater than the control means (C) and in how many the trend was reverse. This relative position of the  
150 means across studies is compared non-parametrically to see whether the trend across studies was non-random,  
151 significant ones being indicated by asterisk. The table also gives in how many studies T was significantly

152 greater than C and vice versa. It can be seen that for fasting glucose the difference is not significant in majority  
 153 of studies and where there is statistical significance there is lack of consistency across studies. However, at 30,  
 154 60 and 120 minutes the knockouts have consistently elevated levels of glucose as compared to the  
 155 corresponding controls.

|                  | <b>Total studies</b> | <b>T&gt;C</b> | <b>T&lt;C</b> | <b>p using chi square</b> | <b>T &gt; C individually significant</b> | <b>T &lt; C individually significant</b> |
|------------------|----------------------|---------------|---------------|---------------------------|------------------------------------------|------------------------------------------|
| <b>All IRKOs</b> |                      |               |               |                           |                                          |                                          |
| Fasting          | 46                   | 25            | 20            | 0.454                     | 13                                       | 4                                        |
| 15 minutes       | 14                   | 7             | 7             | 0.999                     | 4                                        | 2                                        |
| 30 minutes       | 40                   | 36            | 4             | <0.0001*                  | 22                                       | 1                                        |
| 60 minutes       | 40                   | 36            | 4             | <0.0001*                  | 24                                       | 1                                        |
| 120 minutes      | 46                   | 37            | 9             | <0.0001*                  | 24                                       | 2                                        |
| <b>FIRKO</b>     |                      |               |               |                           |                                          |                                          |
| Fasting          | 12                   | 9             | 3             | 0.083                     | 9                                        | 1                                        |
| 15 minutes       | 3                    | 1             | 2             | 0.566                     | 1                                        | 1                                        |
| 30 minutes       | 9                    | 7             | 2             | 0.095                     | 6                                        | 1                                        |
| 60 minutes       | 9                    | 7             | 2             | 0.095                     | 5                                        | 1                                        |
| 120 minutes      | 12                   | 9             | 3             | 0.83                      | 7                                        | 2                                        |
| <b>MIRKO</b>     |                      |               |               |                           |                                          |                                          |
| Fasting          | 10                   | 3             | 7             | 0.205                     | 0                                        | 2                                        |
| 15 minutes       | 6                    | 3             | 3             | 0.999                     | 1                                        | 0                                        |
| 30 minutes       | 10                   | 9             | 1             | 0.011*                    | 3                                        | 0                                        |
| 60 minutes       | 10                   | 9             | 1             | 0.011*                    | 3                                        | 0                                        |
| 120 minutes      | 10                   | 6             | 4             | 0.527                     | 3                                        | 0                                        |
| <b>LIRKO</b>     |                      |               |               |                           |                                          |                                          |
| Fasting          | 9                    | 4             | 5             | 0.739                     | 0                                        | 0                                        |
| 15 minutes       | 1                    | 1             | 0             | N.A.                      | 0                                        | 0                                        |

|              |   |   |   |         |   |   |
|--------------|---|---|---|---------|---|---|
| 30 minutes   | 9 | 9 | 0 | 0.003*  | 6 | 0 |
| 60 minutes   | 9 | 9 | 0 | 0.003*  | 7 | 0 |
| 90 minutes   | 9 | 9 | 0 | 0.003*  | 5 | 0 |
| 120 minutes  | 9 | 7 | 2 | 0.094   | 4 | 0 |
| <b>βIRKO</b> |   |   |   |         |   |   |
| Fasting      | 8 | 6 | 2 | 0.157   | 4 | 0 |
| 15 minutes   | 2 | 2 | 0 | 0.157   | 2 | 0 |
| 30 minutes   | 8 | 7 | 1 | 0.033*  | 6 | 0 |
| 60 minutes   | 8 | 7 | 1 | 0.033*  | 7 | 0 |
| 90 minutes   | 4 | 4 | 0 | 0.046*  | 4 | 0 |
| 120 minutes  | 8 | 8 | 0 | 0.0046* | 7 | 0 |

156

157

158 **Figure 1:** Glucose levels for control (black squares) and FIRKO (red squares) at steady-state and perturbed  
159 state. The forest plot is normalized to the control and difference of FIRKO glucose levels plotted with  $\pm$  95% CI.  
160 (A) fasting glucose and (B) to (E) post glucose load glucose at different time intervals.

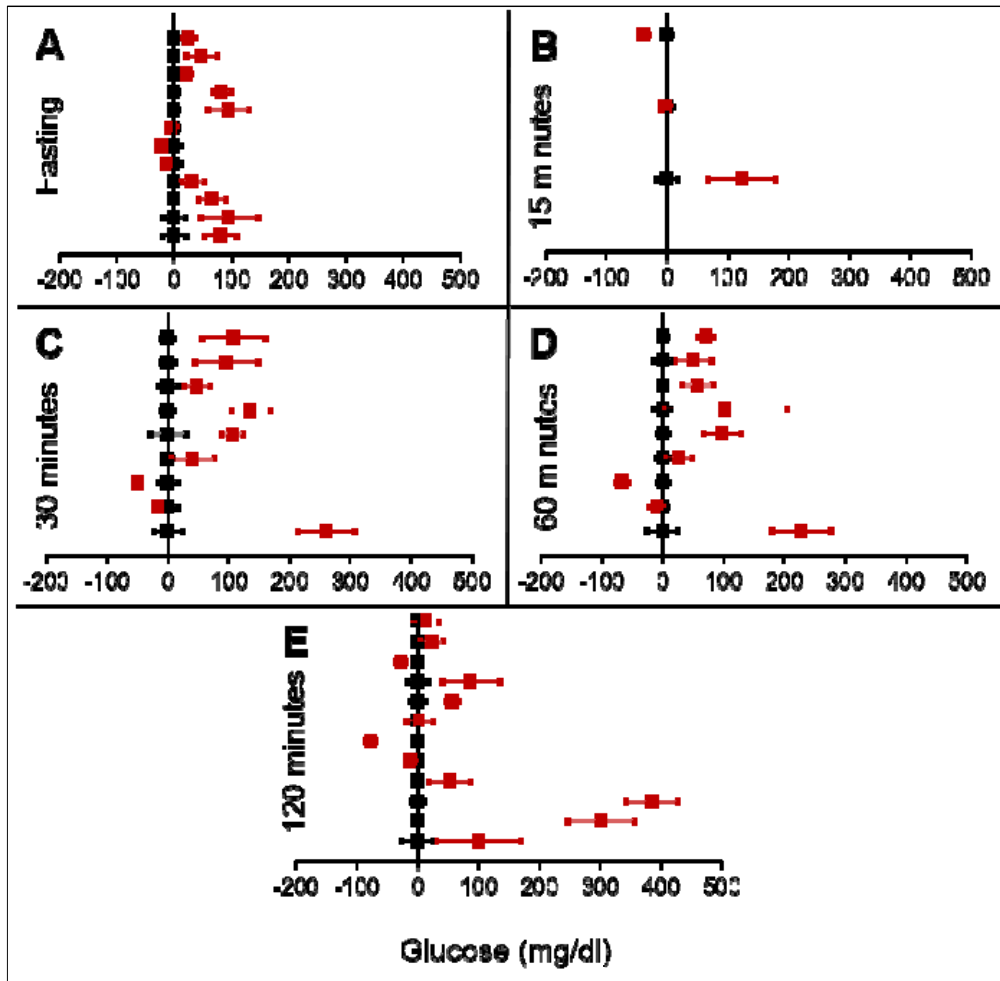

161

162

163

164 **Figure 2:** Results with **MIRKO** represented as in figure 1. Note that fasting glucose does not differ from the  
165 control in any of the experiments.

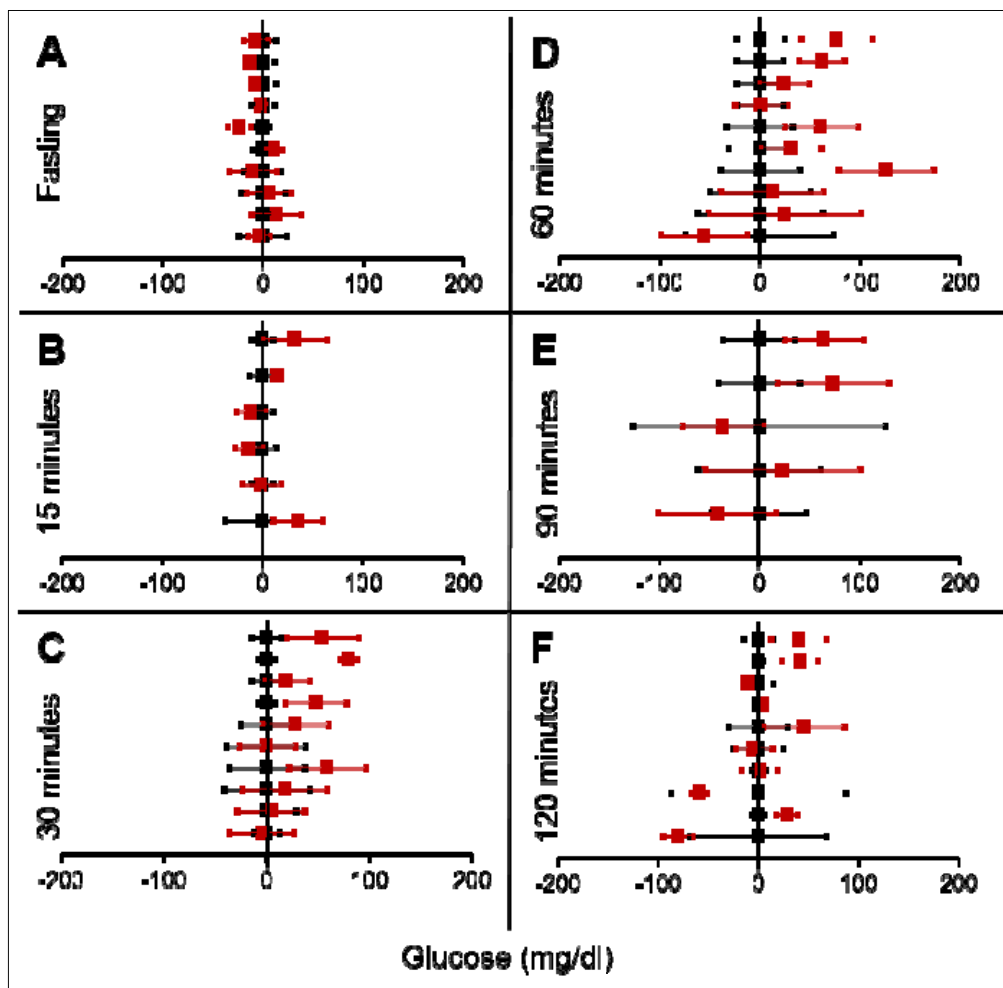

166  
167  
168

169 **Figure 3:** Results with **LIRKO** represented as in figure 1. Note that inconsistent with classical belief, liver  
170 specific insulin receptor knockout does not show significant effect on fasting glucose in any of the experiments.  
171 On the other hand post load glucose is consistently higher.

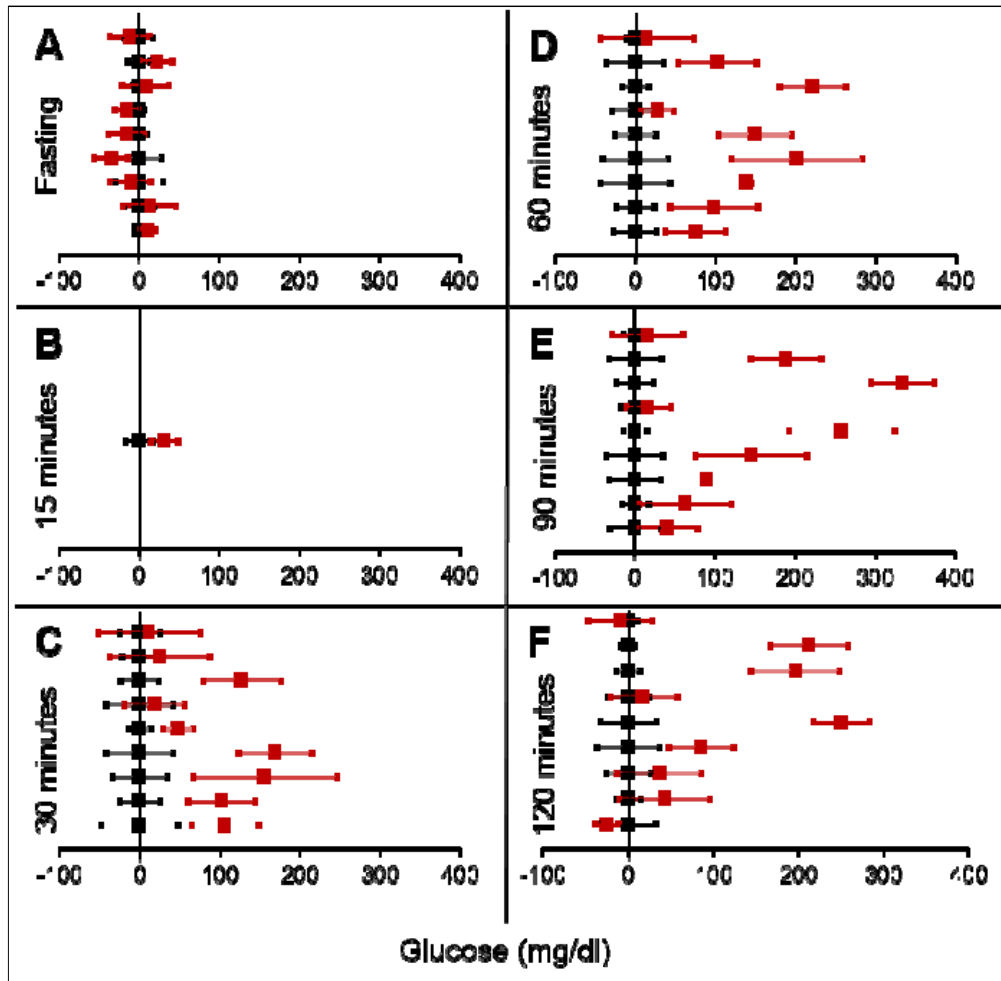

172

173

174

175 **Figure 4:** Results with  $\beta$ IRKO represented as in figure 1. Note that fasting glucose does not differ from the  
176 control in any of the experiments.

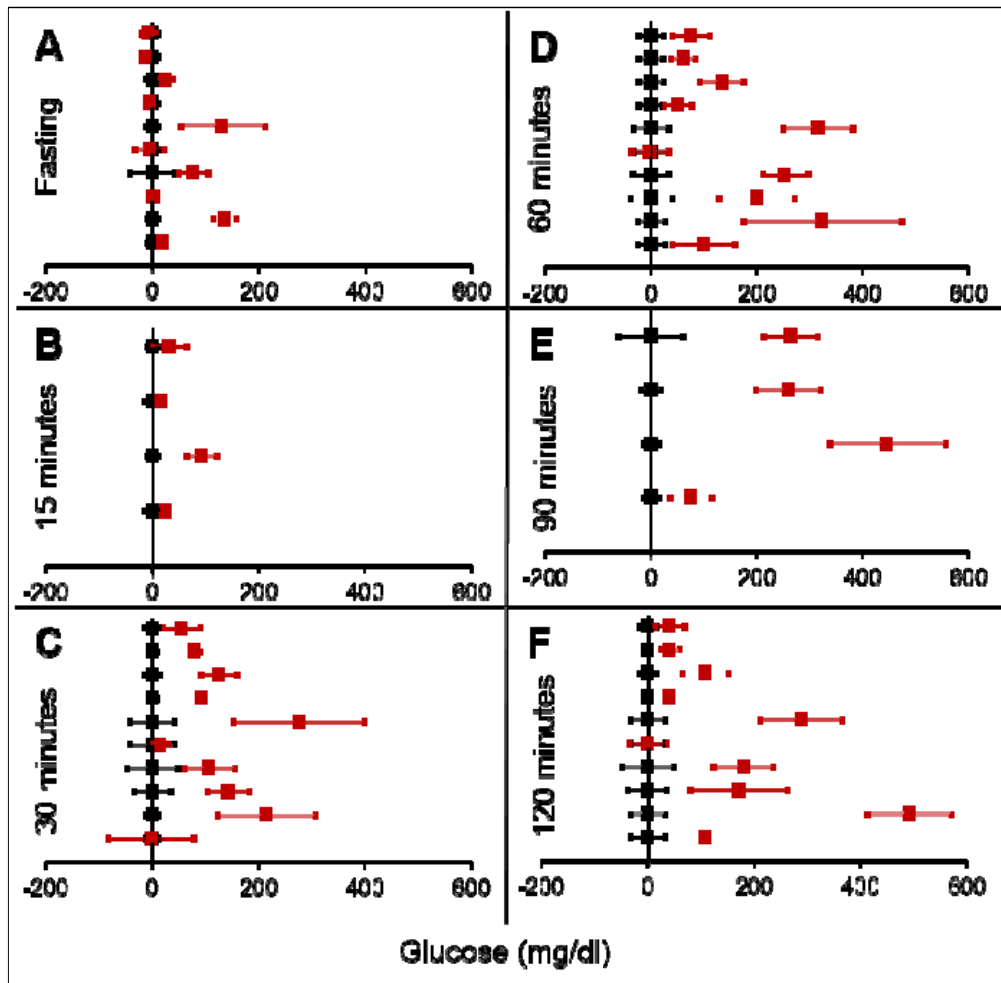

177

178

### 179 3. Systematic review and meta-analysis of insulin increase and insulin suppression

#### 180 experiments

181

182 The insulin receptor knockout experiments are based on the assumption that the main action

183 of insulin is through the specific receptors. It can be argued that insulin acts through other

184 receptors or may have other mechanisms of action yet unknown and therefore receptor

185 knockouts do not fully eliminate insulin action. Alternatively, we can alter insulin level itself

186 to see how it affects glucose level in fasting state or post glucose load. Insulin is known to

187 alter plasma glucose immediately on administration but this is not a steady-state response. If  
188 insulin levels can be raised or lowered and sustained long enough to reach a steady state, the  
189 effect of insulin on glucose in a steady-state can be studied. If insulin affects steady-state  
190 glucose, a sustained rise in insulin will result into a sustained lower steady-state glucose  
191 level. Conversely a sustained suppression of insulin would lead to higher steady-state  
192 glucose. We studied published literature for experiments where a stable and sustained  
193 increase or decrease in insulin was achieved and then the effect on fasting glucose and GTT  
194 studied.

195

### 196 ***3.1 Methods***

197

#### 198 ***3.1.1 Increase in insulin***

199 The model of choice for a sustained increase in insulin levels is a knock out or inhibition of  
200 the insulin degrading enzyme (IDE). An interplay between insulin secretion and insulin  
201 degradation maintains the level of insulin in plasma (53–56). Plasma insulin has a half-life of  
202 4 to 9 minutes (57,58) and it is degraded predominantly by the insulin degrading enzyme  
203 (IDE) (54,57). Inhibition of IDE has been considered as a therapeutic option for type 2  
204 diabetes with limited success (59,60). We performed a systematic literature review to find out  
205 experiments in which IDE was inhibited to obtain a sustained high plasma insulin level and,  
206 in such animals, GTT was performed (table 3).

207

#### 208 ***3.1.2 Decrease in insulin***

209 We performed a systematic literature review for experiments in which there was sustained  
210 suppression of insulin production. Two insulin suppressing agents have been repeatedly used  
211 to lower insulin production in rodent models as well as in humans.



- 212 (i) Diazoxide (DZX): Diazoxide is a potassium channel activator which causes  
213 reduction in insulin secretion by the  $\beta$ -cells by keeping the cells in a  
214 hyperpolarized state by opening the channel (61). It has been used as a drug to  
215 modulate insulin secretion for research and therapeutic purposes (62).
- 216 (ii) Octreotide (OCT): Octreotide is a somatostatin analogue which inhibits insulin  
217 and growth hormone. It has been used to reduce insulin secretion *in vitro* and  
218 *in vivo* (63).

219 We searched the literature systematically for studies where the insulin levels have been  
220 altered using either DZX or OCT and glucose tolerance has been examined using a GTT after  
221 DZX/OCT treatment (table 4). It should be noted that this literature includes a significant  
222 proportion of human trials. We also searched literature for studies in which insulin was  
223 suppressed by other methods.

224

## 225 **3.2 Results**

### 226 **3.2.1 Increase in insulin by suppression of IDE**

227 **Table 3:** Systematic literature review for studies on insulin degrading enzyme inhibition/knockout (meta-  
228 analysis 2).

| <b>Meta-analysis 2→</b>                                            | <b>Insulin degrading enzyme</b>                            |
|--------------------------------------------------------------------|------------------------------------------------------------|
| <b>Task performed ↓</b>                                            |                                                            |
| Key word used for the first search on the PubMed/MEDLINE data-base | “insulin degrading enzyme”                                 |
| Number of hits in the first search                                 | 1179                                                       |
| Inclusion criteria for primary screening                           | Studies showing experiments with inhibition of IDE and GTT |
| Number of papers shortlisted based on                              | 33                                                         |

|                                                                                                                                             |                                                                                                                        |
|---------------------------------------------------------------------------------------------------------------------------------------------|------------------------------------------------------------------------------------------------------------------------|
| primary screening                                                                                                                           |                                                                                                                        |
| Inclusion criteria for secondary screening                                                                                                  | Study showed experiments with IDE inhibition, had fasting and post-glucose load readings of control and IDE inhibition |
| Number of papers shortlisted based on screening the full-text and back referencing (data for the meta-analysis extracted from these papers) | 6                                                                                                                      |
| List of the studies used in the final meta-analysis (all were rodent studies; reference numbers given here)                                 | (59,64–68)                                                                                                             |

229

230 **Table 4:** Comparison between steady-state (fasting) and perturbed-state (post glucose load) of control and IDE  
 231 suppression.

|             | <b>Total experiments</b> | <b>T&gt;C</b> | <b>T&lt;C</b> | <b><i>p</i> using chi square</b> | <b>T &gt; C individually significant</b> | <b>T &lt; C individually significant</b> |
|-------------|--------------------------|---------------|---------------|----------------------------------|------------------------------------------|------------------------------------------|
| Fasting     | 18                       | 12            | 6             | 0.157                            | 0                                        | 1                                        |
| 15 minutes  | 14                       | 7             | 7             | 0.999                            | 3                                        | 5                                        |
| 30 minutes  | 18                       | 10            | 8             | 0.637                            | 5                                        | 2                                        |
| 60 minutes  | 18                       | 11            | 7             | 0.346                            | 5                                        | 1                                        |
| 90 minutes  | 16                       | 13            | 3             | 0.012*                           | 4                                        | 0                                        |
| 120 minutes | 18                       | 15            | 2             | 0.002*                           | 2                                        | 1                                        |

232 **Figure 5:** Results with **IDE inhibition** represented as in figure 1. Note that fasting glucose does not differ  
 233 significantly from the control. At 90 and 120 minutes the trend is higher mean glucose than control which is  
 234 contrary to the expectation in an experiment with sustainable rise in insulin.

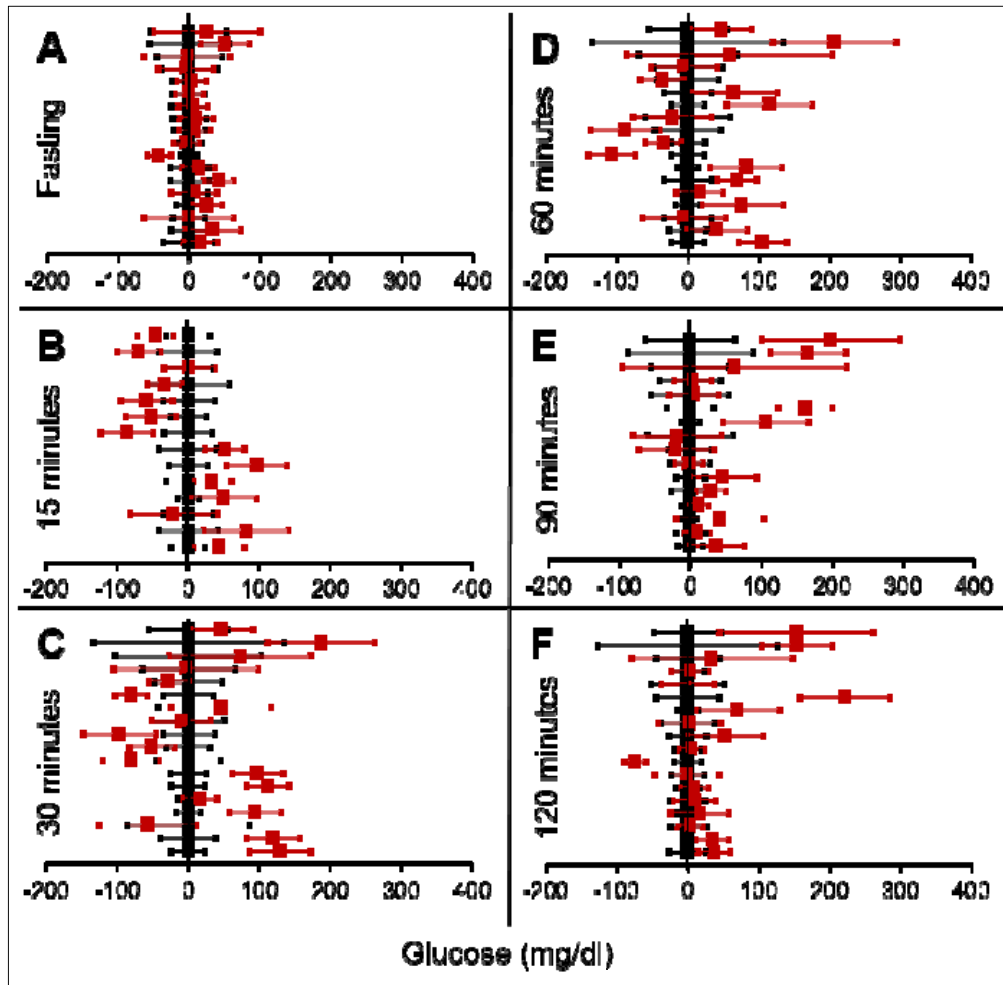

235

236

237 We found 6 publications that described 18 experiments that allowed comparison of GTT  
238 between raised insulin groups and control group (table 2 of supplementary information 1).  
239 Meta-analysis revealed no significant difference in the fasting glucose. In only one out of 18  
240 experiments the treatment group had lower fasting glucose than the control. During the GTT  
241 curve, at 90 and 120 minutes the difference between treatment and control were significant  
242 but in the opposite direction of the expectation. While rise in insulin level should reduce  
243 plasma glucose, it increased in 15 out of 18 studies, two of which were individually  
244 significant and the difference was significant in non-parametric meta-analysis. Across all  
245 time points along the GTT, the plasma glucose in the treated group was greater than the

246 control group in majority of the experiments. Thus, in this class of experiments increasing  
 247 insulin failed to reduce glucose at the steady-state as well as post glucose load.

248

249 **3.2.2: Decrease in insulin: Suppression by diazoxide or octreotide**

250

251 **Table 5:** Systematic literature review for studies on insulin suppression with diazoxide and octreotide

| <b>Meta-analyses 3 and 4 →</b><br><b>Task performed ↓</b>         | <b>Diazoxide</b>                                                                                                                     | <b>Octreotide</b>                                                                                               |
|-------------------------------------------------------------------|--------------------------------------------------------------------------------------------------------------------------------------|-----------------------------------------------------------------------------------------------------------------|
| Key word used for the first search on the PubMed/MEDLINE database | “diazoxide and diabetes”;<br>“insulin suppression”                                                                                   | “octreotide and diabetes”;<br>“insulin suppression”                                                             |
| Number of hits in the first search                                | 1043                                                                                                                                 | 1202                                                                                                            |
| Inclusion criteria for primary screening                          | Study shows stable insulin suppression using diazoxide and a GTT has been performed after insulin suppression.                       | Study shows stable insulin suppression using octreotide and a GTT has been performed after insulin suppression. |
| Papers shortlisted based on primary screening                     | 239                                                                                                                                  | 289                                                                                                             |
| Inclusion criteria for secondary screening                        | Study showed similarities in the concentration of diazoxide used; and had fasting and post glucose bolus readings of the control and | Study showed similarities in the concentration of octreotide used; and had fasting and post glucose bolus       |

|                                                                                                                                   | diazoxide subjects                      | readings of the control and octreotide subjects |
|-----------------------------------------------------------------------------------------------------------------------------------|-----------------------------------------|-------------------------------------------------|
| Papers shortlisted based on screening the full-text and back referencing (data for the meta-analyses extracted from these papers) | Rodent studies (2)<br>Human studies (6) | Rodent studies (0)<br>Human studies (10)        |
| List of the studies used in the final meta-analysis                                                                               | (69–76)                                 | (77–86)                                         |
| Human studies (reference numbers given here)                                                                                      | (69,72–76)                              | (77–86)                                         |
| Rodent studies (reference numbers given here)                                                                                     | (70,71)                                 | None                                            |

252

253

254 **Table 6:** Comparison between steady-state(fasting) and perturbed-state (post glucose load) of control and  
 255 insulin suppression.

|                             | <b>Total studies</b> | <b>T&gt;C</b> | <b>T&lt;C</b> | <b><i>p</i> using chi square</b> | <b>T &gt; C individually significant</b> | <b>T &lt; C individually significant</b> |
|-----------------------------|----------------------|---------------|---------------|----------------------------------|------------------------------------------|------------------------------------------|
| <b>Diazoxide treatment</b>  |                      |               |               |                                  |                                          |                                          |
| Fasting                     | 14                   | 10            | 3             | 0.052                            | 5                                        | 0                                        |
| 15 minutes                  | 7                    | 6             | 1             | 0.059                            | 1                                        | 1                                        |
| 30 minutes                  | 12                   | 10            | 2             | 0.021*                           | 2                                        | 1                                        |
| 60 minutes                  | 13                   | 9             | 4             | 0.166                            | 4                                        | 2                                        |
| 90 minutes                  | 3                    | 3             | 0             | 0.083                            | 2                                        | 0                                        |
| 120 minutes                 | 14                   | 10            | 3             | 0.052                            | 6                                        | 1                                        |
| <b>Octreotide treatment</b> |                      |               |               |                                  |                                          |                                          |
| Fasting                     | 15                   | 6             | 7             | 0.781                            | 0                                        | 0                                        |
| 30 minutes                  | 14                   | 4             | 10            | 0.108                            | 0                                        | 2                                        |
| 60 minutes                  | 14                   | 4             | 10            | 0.108                            | 2                                        | 1                                        |
| 90 minutes                  | 13                   | 5             | 8             | 0.405                            | 1                                        | 0                                        |
| 120 minutes                 | 15                   | 7             | 8             | 0.797                            | 1                                        | 1                                        |

256

257 We found 8 papers describing 14 experiments for diazoxide treatment and 10 papers with 15  
 258 experiments for octreotide treatment (tables 3 and 4 from supplementary information 1  
 259 respectively). It can be seen from table 6 and fig 6 that for both of the insulin suppressing  
 260 agents, suppression of insulin did not result into increased fasting glucose. Further at 120  
 261 minutes post glucose load there was a marginally significant rise in glucose in the insulin  
 262 suppressed group as compared to control group. This demonstrates that pharmacological

263 suppression of insulin was unable to raise plasma glucose level in a fasting steady state.

264 There was inconsistent but significant rise post glucose load.

265 **Figure 6:** Results with **Insulin suppression with Diazoxide and Octreotide** represented as in figure 1. Note

266 the inconsistencies across studies.

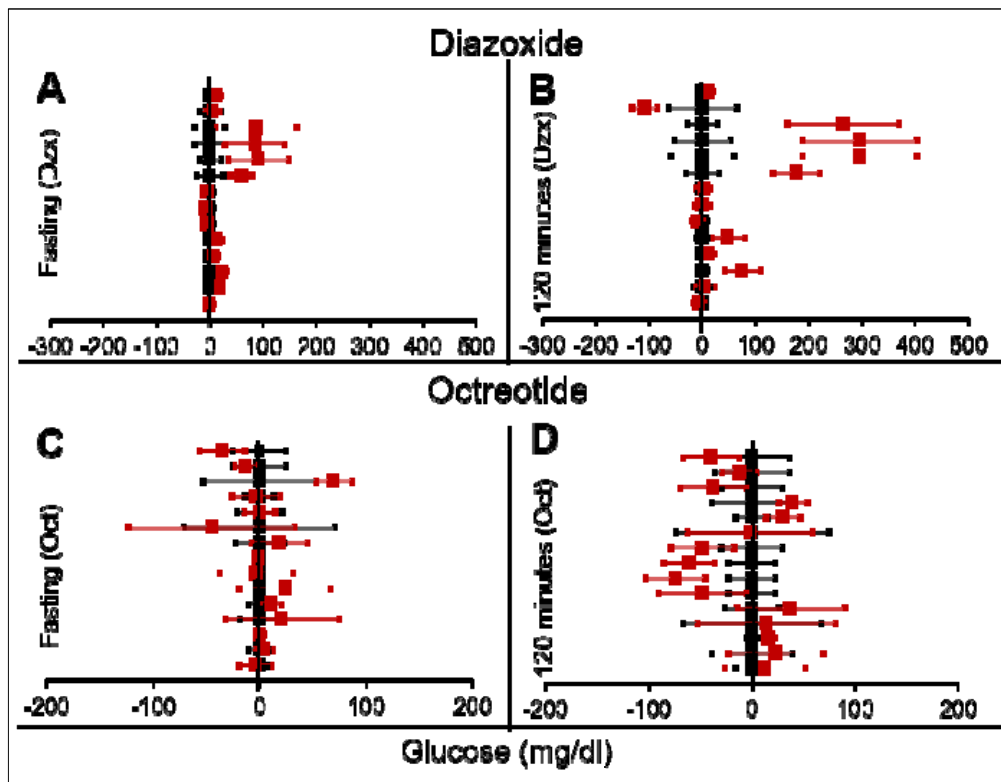

267

268

269 We found more means of insulin suppression in which GTT after suppression was reported,

270 but there were not many published replications of the experiments coming independently

271 from different research groups. Therefore meta-analysis was not warranted. We briefly

272 review their results here.

273

274 *Suppression by Protein restriction:* Dietary protein deprivation is another method of insulin

275 suppression. This also led to a decrease in plasma insulin levels; however fasting glucose

276 levels did not increase (87).

277

278 *Suppression by insulin siRNA*: Transgenic mice for insulin-siRNA along with IDE  
279 overexpression, showed decreased levels of insulin. Again the fasting glucose levels  
280 remained normal while there was a change in glucose tolerance curve (figure 7) (88). The  
281 curves in figure 7 are typical of insulin receptor knockout or insulin suppression experiments  
282 where, in individuals with impaired insulin signalling the glucose peak is higher which  
283 returns to steady-state much later than the controls, but the fasting steady-state level is not  
284 different.

285

286 **Figure 7:** Intra peritoneal glucose tolerance test (panel A and B). Fasting glucose levels in both the siRNA  
287 treated and untreated group remain unaltered in male and female mice. 15 minutes after the glucose injection,  
288 the treated mice show higher glucose levels relative to the untreated mice and this effect is seen throughout till  
289 120 minutes. Figure redrawn from data by (88).

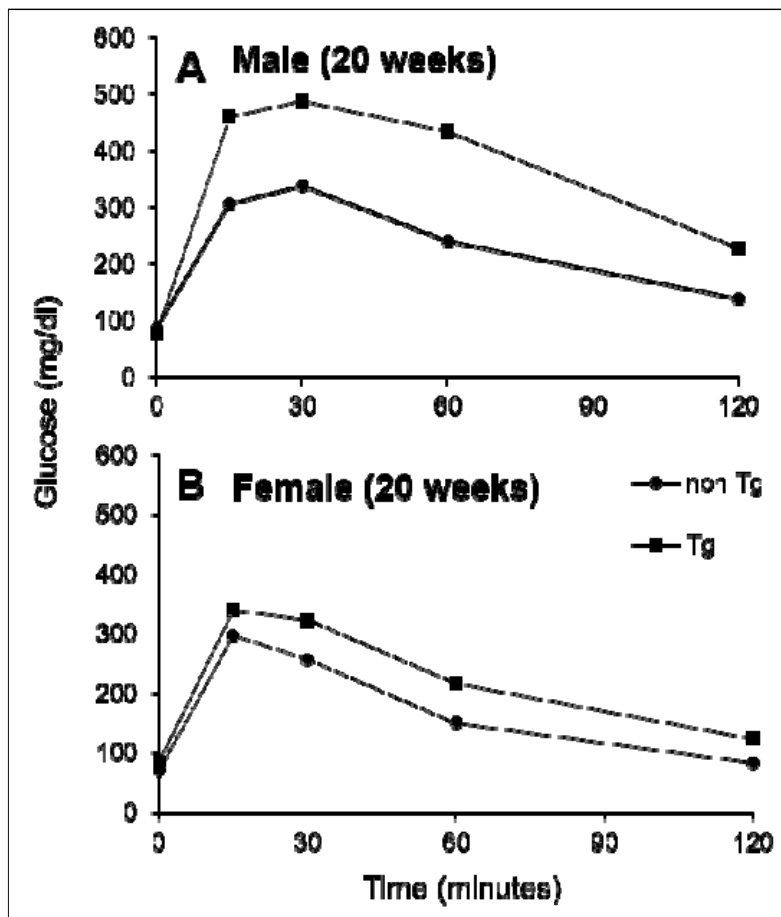

290



291 *Suppression of insulin by partial gene ablation:* In rodents, there are two insulin genes *Ins1*  
292 and *Ins2* (89). A double knockout of both the genes results in death, but ablation of either of  
293 the genes does not alter the glucose tolerance significantly suggesting redundancy (90). There  
294 are studies in which one gene is completely knocked out and the other one is a heterozygote  
295 (90–94). Reduced insulin gene dosage did not consistently result into fasting hyperglycemia  
296 in these studies although it offered protection against some of the effects of hyperinsulinemia.  
297

#### 298 **4. Steady-state versus post feeding glucose in STZ rats**

299 Streptozotocin (STZ) induced diabetes is a popular model of rodent diabetes. STZ acts by  
300 specifically destroying the insulin producing  $\beta$  cells of the pancreatic islets. A low dose of  
301 STZ that destroys a substantial population of  $\beta$  cells but does not lead to total destruction of  
302 their population is often perceived as a good model for T2D, whereas a high dose of STZ that  
303 destroys the  $\beta$  cell population almost entirely is perceived as a model of T1D. We searched  
304 literature to look for studies that carefully differentiated between steady-state glucose from  
305 post load glucose in STZ models but did not find any studies that make this distinction clear.  
306 Therefore, we designed and conducted experiments to differentially study the steady-state  
307 and perturbed-state glucose levels in rats treated with STZ.

308

#### 309 **4.1 Experimental methods**

310

##### 311 **4.1.1 Animal model and conditions**

312 The experiments performed on Sprague Dawley (SD) rats had been approved by the  
313 Institutional Animal Ethics Committee at IISER, Pune (Protocol Number IISER/IAEC/2016-  
314 02/006) constituted by CPCSEA, Govt. of India. All the rats were housed in a facility with a  
315 temperature of  $23\pm 2^\circ\text{C}$  and a 12-hour light/dark cycle with standard rat chow and water

316 available ad libitum. The bedding of the cages was changed every three days.

317

#### 318 ***4.1.2 STZ treatment for insulin suppression***

319 Male, SD rats weighing 180-200 g were injected with STZ at 50 mg/kg body weight. The  
320 STZ was dissolved in Citrate Buffer (Citric Acid: 0.1M and Sodium Citrate: 0.1M). Injection  
321 of citrate buffer alone was used as control.

322

#### 323 ***4.1.3 Fasting and post-feeding glucose in 12 day follow up***

324 Three days after the STZ injection, the rats were fasted for 16 hours and glucose was  
325 measured using the hand held Accu-Chek Glucometer. The rats were then given 40 grams of  
326 Standard Chow for 8 hours. Food was weighed and post-meal glucose was measured after  
327 three hours. The protocol was repeated for 12 days and body weight, food weight and glucose  
328 readings were taken daily. 12 animals per group were used for this experiment.

329

#### 330 ***4.1.4 Duration of fasting***

331 An experiment was also performed to see how much time was required to reach a steady-state  
332 of glucose after removal of food. The food was removed from the STZ and Control animals  
333 after ad libitum availability and glucose readings were taken after 3 hours, 6 hours, 9 hours,  
334 12 hours and 16 hours. After a recovery of three days, glucose levels were measured only at  
335 16 hours after removing the food. 9 STZ treated animals and 10 Control animals (injected  
336 with citrate buffer) were used for this experiment.

337

338 **Figure 8:** Treatment of SD rats with STZ. (A): The 16-hour fasting and post-meal glucose values of treated  
339 (STZ 50mg/kg) and control rats (Citrate buffer CB) over 12 days. N= 12 for each group. Note that on 10 out of  
340 12 days the mean fasting glucose of the treated group (STZ-F) was not significantly different from the control  
341 mean (CB-F). Post feeding the treated group (STZ-P) has substantially greater mean than the control (CB-P).

342 (B) Time course of glucose during 16 hours fasting. X axis represents the time after removal of food when the  
343 glucose readings are taken and Y axis represent the glucose levels. The grey band represents the upper and  
344 lower bounds of 95% CI of the control group with the mean glucose values represented by filled circles. Filled  
345 squares represent individuals that showed a monotonic decrease in glucose levels. In three animals the glucose  
346 levels reduced at or below the control levels and in two others they showed a continued monotonic decrease but  
347 did not reach the normal level in 16 hours. Filled triangles with dotted lines represent the individual time courses  
348 of the three STZ treated rats which showed some indications of stabilizing at a steady-state above the normal.

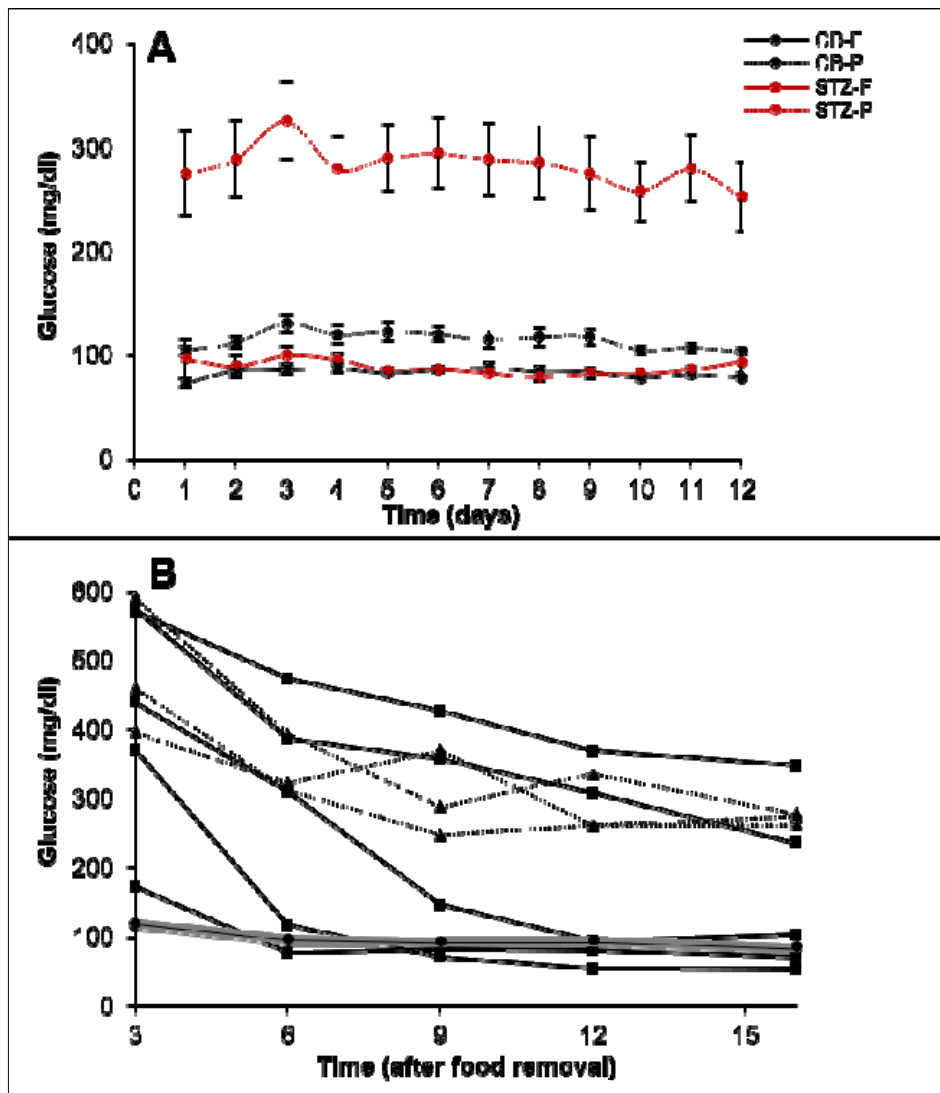

349

#### 350 4.2 Results

351 Among the STZ treated rats, all the animals showed significantly higher post load glucose  
352 than the control group on all the 12 days sampled. However, in 10 out of the 12 days the 16-

353 hour fasting glucose was not significantly different from the control although the variance  
354 was substantially greater than that of the control (figure 8).  
355  
356 A close look at the time course of fasting in the two groups revealed that in 4 out of 9 STZ  
357 animals the glucose levels reached the normal range but with substantial delay as compared  
358 to control animals. In two more animals the levels did not reach the normal range till 16 hours  
359 but a monotonic decrease continued throughout the period, indicating that their blood glucose  
360 may not have reached a steady-state in 16 hours. Only in 3 animals the 16-hour glucose was  
361 higher than the control range with some indications of stabilizing at a higher level. In the time  
362 course experiment, the animals are handled frequently leading to some unavoidable stress. In  
363 the 12 day follow up plasma glucose is estimated only after 16 hours and here there is no  
364 significant difference in the control and STZ animals on 10 out of 12 days. Furthermore the  
365 individuals that showed higher 16 hour fasting glucose did not do so consistently. In the 12  
366 days follow up, the distribution of 16-hour fasting glucose was typically skewed with one or  
367 two outliers having high glucose levels. Interestingly the outliers were not the same animals  
368 every day. There was considerable day to day variation in individuals and averaged over the  
369 12 days, none of the STZ animals showed significantly higher fasting glucose than the  
370 controls although they consistently showed higher post feeding glucose.  
371 Thus, these experiments show on the one hand that STZ treatment failed to increase steady  
372 state glucose levels significantly and consistently. On the other, the STZ animals took  
373 substantially longer and rather unpredictable time to reach a steady-state and even at 16-hours  
374 of fasting, all individuals need not have attained a steady state. These results warrant caution  
375 against considering fixed hours fasting glucose as steady-state glucose in experimental or  
376 epidemiological data. While in healthy individuals it is well established that following  
377 glucose load a steady-state is regained in about two hours, it is possible that in experimental

378 impairment of insulin signalling or in clinical diabetes, plasma glucose takes substantially  
379 longer time to reach a steady-state and overnight fasting need not represent a steady-state in  
380 all cases.

381

## 382 ***5. Theoretical and mathematical considerations***

383 In this approach we elaborate on the theoretical underpinnings of insulin-glucose relationship.  
384 We also explore possible explanations for the unexpectedly consistent failure of experimental  
385 insulin signal impairment to alter steady-state glucose level. Simultaneously we make  
386 differential predictions from alternative homeostasis models that can be tested in human  
387 epidemiological data.

388

### 389 ***5.1 Choice of Models for glucose homeostasis***

390 The fasting state has been generally accepted to be a steady-state for glucose concentration  
391 for several reasons. In a given healthy individual the fasting glucose levels are stable in time  
392 (95,96). The post-meal peak of glucose and insulin returns to the fasting level within a few  
393 hours and remains stable over a long time. The fasting state is considered and modelled as a  
394 steady-state by the widely used HOMA model (28,29). Classically the negative feedback  
395 loops are assumed to work through insulin and insulin is taken as a determinant of steady-  
396 state glucose level. Most popular models of glucose homeostasis work on this assumption  
397 although non-steady-state models of insulin resistance exist (97).

398 A critical question in glucose homeostasis is whether the fasting steady-state glucose level is  
399 a consequential balance between glucose production and glucose utilization rates  
400 (consequential steady-state CSS) or whether there is a target glucose level that is maintained  
401 by sensing and correcting any changes in it (targeted steady-state TSS). The difference in the  
402 two can be visualized by the tank water level analogy (fig 9). If a tank has an input tap

403 releasing water in it at a constant rate and has an outlet at the bottom through which water  
404 escapes proportionate to the pressure of the water column, a steady-state is invariably  
405 reached. The steady-state level is decided by the rate of intake and the size of the outlet. This  
406 is a CSS which will change with any change in the size/capacity of the input or the outlet tap.  
407 In contrast to CSS, in a TSS there is a desired water level and sensors are placed above and  
408 below the desired level such that when the level goes below the lower sensor the input is  
409 switched on or its rate increased and/or output switched off or its rate decreased.

410

411 **Figure 9:** The consequential steady-state (CSS) (A) and targeted steady-state (TSS) (B) models of homeostasis  
412 illustrated with a tank water level analogy. In CSS a change in the size of inlet or outlet tap, analogous to insulin  
413 sensitivity can change the steady-state level. In a TSS model, a change in the tap size will alter the time required  
414 to reach a steady-state but will not change the steady-state level.

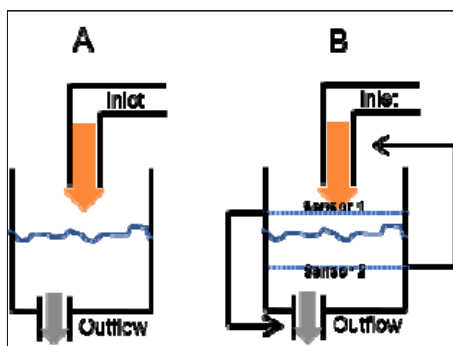

415

416 In glucose homeostasis, in a fasting state, liver glucose production is analogous to the inlet  
417 tap and tissue glucose uptake analogous to the size of the outlet, both being a function of  
418 insulin signalling. Most models of glucose regulation assume CSS (28,29,58,98–100) (97). It  
419 has not been critically examined whether CSS or TSS describes glucose homeostasis more  
420 appropriately. This is important because if TSS model is appropriate, insulin resistance and  
421 relative insulin deficiency will not result into altered steady-state glucose levels although the  
422 time required for reaching a steady-state after perturbation might change. If CSS model is  
423 appropriate, insulin resistance or altered insulin levels are bound to change fasting glucose  
424 levels. The failure of insulin receptor knockouts and insulin suppression experiments to alter

425 the fasting steady state, along with the delay in reaching the steady-state indicates that TSS  
426 model is likely to describe glucose homeostasis more appropriately. The TSS model requires  
427 mechanisms of sensing any departure from the targeted steady state. Such mechanisms are  
428 not known in peripheral systems but glucose sensing neurons are certainly known to be  
429 present in the brain. Therefore, if TSS is a more appropriate model, the CNS mechanisms are  
430 likely to be central to glucose homeostasis, particularly in determining the steady-state levels;  
431 whereas insulin signalling would play a role in determining the rate at which a steady-state is  
432 reached after perturbation.

433

434 It is possible to make other testable predictions of TSS and CSS models. In the normal  
435 healthy individual, increased glucose utilization is expected to decrease fasting glucose levels  
436 by the CSS model but not by the TSS model. Human experiments have shown that sustained  
437 exercise does not reduce plasma glucose, in fact it might increase (101). In order to match  
438 with experimental data, CSS based models of glucose dynamics during exercise need to  
439 include additional terms which involve neuronal mechanisms such as direct stimulation of  
440 liver glucose production in response to exercise through sympathetic route (102). This brings  
441 the model close to a TSS model. If TSS model describes glucose homeostasis more  
442 appropriately, reduced insulin signalling is not expected to change steady-state glucose but  
443 only alter the time course to reach a steady state.

444

445 The mechanism of attaining a hyperinsulinemic normoglycemic prediabetic state is different  
446 by the CSS and TSS models. By the classical CSS based pathway, obesity induced insulin  
447 resistance is believed to be primary. The insulin resistance reduces glucose uptake and the  
448 excess glucose triggers a compensatory insulin response. The resultant hyperinsulinemia  
449 compensates for insulin resistance keeping the fasting glucose levels normal. Detailed

450 analysis of the model and matching its prediction with empirical data has refuted this model  
451 (30). One of the intuitively appealing reasons for this refutation is that after the heightened  
452 insulin levels normalize glucose, there is no reason why insulin levels remain high.  
453 Therefore, a steady-state with hyperinsulinemia and normoglycemia is impossible by the CSS  
454 model but it exists in a prediabetic state. If a “compensatory” insulin response is mediated by  
455 glucose, one would expect a positive correlation between fasting glucose (FG) and fasting  
456 insulin (FI) and no correlation between insulin resistance and  $\beta$  cell responsiveness.  
457  
458 By the TSS model, on the other hand, compensatory response is possible in either way.  
459 Primary insulin resistance may increase the glucose levels transiently, but when glucose  
460 sensing mechanisms detect the change a compensatory response can be operational. By this  
461 mechanism a hyperinsulinemic normoglycemic state is possible. Alternatively, primary  
462 hyperinsulinemia (7,103–105) can also be compensated by increased insulin resistance by  
463 hitting the lower level of sensing which would trigger compensatory insulin resistance. Even  
464 in this case a hyperinsulinemic normoglycemic state is possible. Both glucose sensing  
465 neurons and neuronal regulation of insulin release and liver glucose production are well  
466 known. In the compensatory response mediated by TSS pathways there need not be a  
467 correlation between fasting insulin and fasting glucose, but insulin resistance and  $\beta$  cell  
468 response would be correlated.  
469 Also using a simple CSS model (see supplementary information 2 for details), simulations  
470 show that the correlation coefficient and regression slope in the insulin-glucose relationship  
471 would remain the same in the fasting as well as post-meal state although the range of glucose  
472 and insulin levels will be different. On the other hand, in a TSS model the post-meal glucose  
473 and insulin levels are expected to be correlated but the steady-state levels may not. We test  
474 these predictions by the alternative models using human epidemiological data below.



475

476 We argued above that since on impairment of insulin signalling, the time required to reach a  
477 steady-state can be substantially longer, overnight fasting may not ensure a steady-state in all  
478 individuals. Fasting hyperglycaemia in T2D can have two alternative (but not mutually  
479 exclusive) causes. Either it represents the failure to reach a steady-state in the specified  
480 fasting period, or it is because of mechanisms other than reduced insulin action. The TSS  
481 model can make differential predictions from the two alternative causes since it predicts a  
482 positive correlation between plasma glucose and plasma insulin in the post-meal state but loss  
483 of this correlation on reaching a steady state. In population data, if some individuals have  
484 reached a steady-state but a few others haven't we would expect a correlation significantly  
485 weaker than the post-meal correlation. These predictions can be tested in epidemiological  
486 data.

487

488 ***6. Analysis of insulin glucose relationship in steady and perturbed-state in human data:***

489 ***Epidemiological inquiry***

490 Here we use human epidemiological data to test the correlational predictions made by the  
491 CSS versus TSS models of glucose homeostasis.

492 **6.1 Methods**

493

494 **6.1.1 Epidemiological data**

495 The three data sets used here come from two different studies: (i) Coronary Risk of Insulin  
496 Sensitivity in Indian Subjects (CRISIS) study, Pune, India (106) and (ii) Newcastle Heart  
497 Project (NHP), UK (107). Data from the latter is divided into two groups as the subjects  
498 belong to different ethnicities namely European white and south Asian and we will prefer to  
499 analyse the two groups separately since certain ethnic differences are likely to be present in  
500 the tendency to develop metabolic syndrome (108,109). Hence all the comparison of  
501 predictions with the data has been done independently for the three data sets. All the studies  
502 are population surveys that include non-diabetic (fasting glucose values less than 110mg/dl)  
503 and diabetic individuals (fasting glucose values above 110 mg/dl) and the clinical history,  
504 morphometric parameters, glucose and insulin during fasting and oral glucose tolerance test  
505 (OGTT) of the subjects were recorded. In the analysis below we included only the non-  
506 diabetic groups in which the homeostatic mechanism can be assumed to be intact and  
507 therefore any hypothesis about it can be tested. Most of the individuals in the diabetic group  
508 would be under different drug regime affecting glucose-insulin dynamics in different ways  
509 and therefore we exclude that group for the analysis.

510

511 **6.1.2 Analysis**

512 Linear regression and correlation were used to compare the glucose-insulin relationship in  
513 steady-state (fasting) versus perturbed-state (post glucose load) in the three data sets along  
514 with the relationships between HOMA-IR and HOMA- $\beta$  derived from the fasting data.

515 **6.2 Results**

516 In all the three data sets there was weak ( $R^2$  range 0.017 to 0.057) but significant correlation  
517 between fasting glucose (FG) and fasting insulin (FI) and strong correlation between HOMA-  
518 IR and HOMA- $\beta$  ( $R^2$  range 0.20 to 0.83) (figure 10).

519

520 **Figure 10:** The Fasting Glucose-Fasting Insulin, Post-meal Glucose-post-meal Insulin and HOMA-IR HOMA- $\beta$   
521 scatter plots in non-diabetic populations in the three data sets. The FG-FI correlation is weak as compared to  
522 post-meal correlation. The HOMA-IR and HOMA-  $\beta$  correlations are very strong in all the three data sets,  
523 which is not expected by the classical insulin resistance theory.

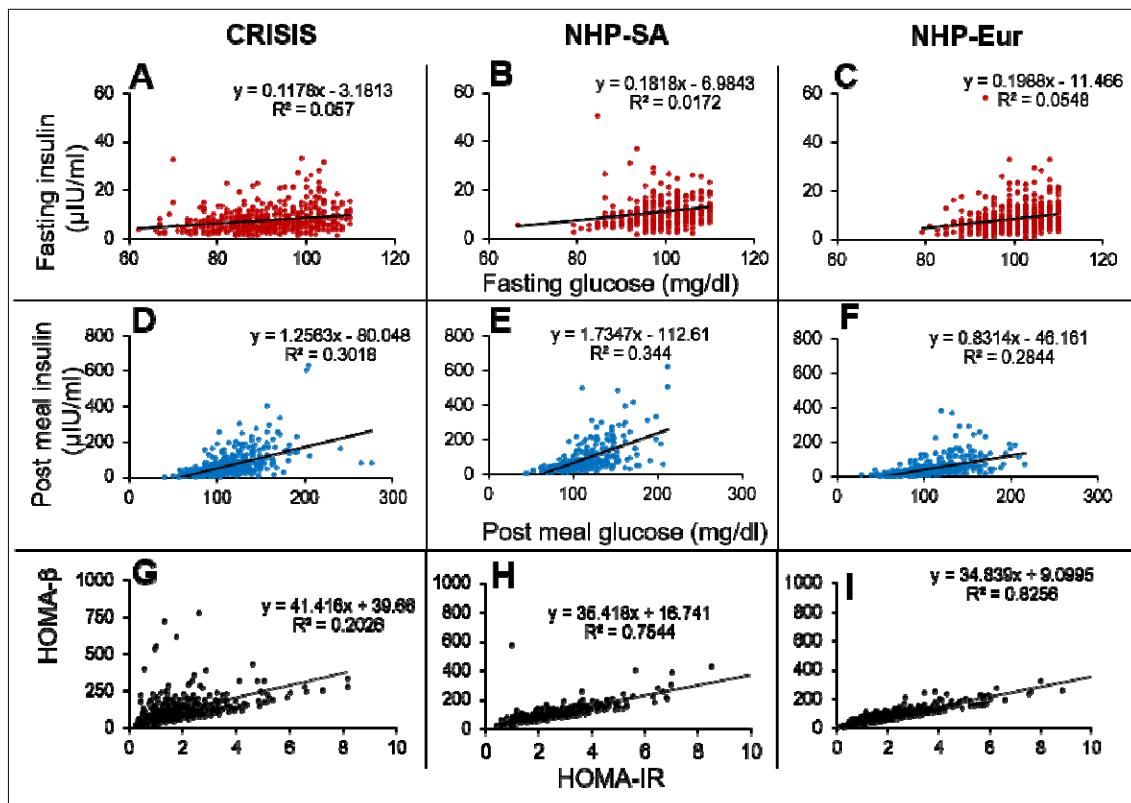

524

525

526 It was seen in all three data sets that the correlation coefficients for glucose and insulin were  
527 an order of magnitude higher in the post-meal cross sectional data than in the fasting state  
528 (Table 7 and fig 10). Also, the regression slopes in the post-meal data were substantially  
529 different from fasting data unlike what is expected by the CSS model (Supplementary

530 information 2). By both the sets of predictions the CSS model predictions are rejected. The  
 531 HOMA-IR HOMA- $\beta$  correlation, as well as the difference between the regression correlation  
 532 parameters between fasting and post-meal data are compatible with predictions of the TSS  
 533 model. However, although weak, there is significant correlation between FG and FI unlike  
 534 what may be expected by a steady-state TSS model. This incompatibility is not sufficient to  
 535 falsify the TSS model since the failure of a small proportion of individuals to have reached a  
 536 steady-state at overnight fasting is sufficient to explain the weak correlation. It is also likely  
 537 that the assumption of fasting may not be true for the entire sample. Even if a small number  
 538 of individuals do not comply with the overnight fasting instructions, a positive correlation can  
 539 result and this possibility is extremely difficult to exclude in human data.  
 540 The support of TSS model over CSS model is important because it accounts for the failure of  
 541 impairment of insulin signalling to alter fasting glucose but increase only post load glucose.  
 542 **Table 7:** Correlation and regression parameters of glucose-insulin relationship at steady and perturbed states.

| Parameter →<br>Data set ↓  | Steady-state(fasting)                |         |                                 | Perturbed-state<br>(2 hours post glucose bolus) |         |                                 |
|----------------------------|--------------------------------------|---------|---------------------------------|-------------------------------------------------|---------|---------------------------------|
|                            | R-squared<br>(variance<br>explained) | p value | Slope (95%<br>CI)               | R-squared<br>(variance<br>explained)            | p value | Slope (95%<br>CI)               |
| CRISIS<br>(N=522)          | 0.0570 (5.7%)                        | <0.0001 | 0.1178<br>(0.0765 to<br>0.1591) | 0.3018<br>(30.18%)                              | <0.0001 | 1.2563<br>(1.0917 to<br>1.4209) |
| NHP-South Asian<br>(N=310) | 0.0172<br>(1.72%)                    | 0.021   | 0.1818<br>(0.0279 to<br>0.3356) | 0.344 (34.4%)                                   | <0.0001 | 1.7347<br>(1.4661 to<br>2.0033) |
| NHP-European<br>(N=574)    | 0.0548<br>(5.48%)                    | <0.0001 | 0.1988 (0.131<br>to 0.2666)     | 0.2844<br>(28.44%)                              | <0.0001 | 0.8314<br>(0.7231 to<br>0.9397) |

543 **7. Discussion**

544

545 The five approaches examined above fail to support the classical belief about glucose insulin  
546 relationship. The insulin receptor knock-out experiments and insulin suppression or  
547 enhancement experiments converge to show that alteration in insulin levels or insulin  
548 sensitivity does not change the steady-state glucose levels. Evidence that it changes the shape  
549 of the glucose curve after food intake or glucose loading is more convincing in spite of some  
550 inconsistency across different experiments. Typically return to the steady-state is delayed by  
551 impaired insulin signalling but the steady-state glucose level remains unchanged.

552 Convergence of experiments using other means of causing specific alterations in insulin  
553 action strengthens the inference.

554 A number of mathematical models attempt to capture the dynamics of glucose homeostasis.

555 A good model should be able to explain all the empirical results summed up here namely the  
556 inability of insulin receptor knockouts, insulin suppression and insulin enhancement

557 experiments to alter steady state glucose levels; the difference in the regression correlation

558 parameters between insulin and glucose in the steady versus perturbed state; the extremely

559 weak correlation between fasting glucose and fasting insulin, but very strong correlation

560 between HOMA-IR and HOMA- $\beta$ ; the hyperinsulinemic-normoglycemic prediabetic state

561 and the phenomenon of impaired glucose tolerance but normal fasting glucose. Reviewing

562 models of glucose homeostasis is beyond the scope of this paper, but we outline here what a

563 good model of glucose homeostasis needs to explain. In our observation, all existing models

564 explain only some of the empirical findings. We suggest here that this inability is because of

565 a questionable common baseline assumption of all models that insulin signalling determines

566 the glucose level in the fasting as well as post feeding conditions. It should be possible to

567 construct such a model, if we realize that insulin affects glucose only in the post feeding but  
568 not in fasting conditions.

569

570 It is difficult to defend the classical assumptions about glucose-insulin relationship against  
571 the multiple convergent lines of evidence. Although results of these experiments have been  
572 there in the published literature for about two decades, these results were mostly explained  
573 away giving different excuses for different sets of experiments. The possible lines of defence  
574 would include difference between homeostatic mechanisms in rodents and humans or the  
575 possibility of non-linear nature of glucose-insulin relationship. The evidence reviewed here  
576 comes from rodents as well as humans and the glucose insulin scatters do not show any clear  
577 indication of non-linearity. Further it would be prudent to avoid making inferences based on  
578 dietary or other complex interventions since they can have multiple mechanisms of action.  
579 Specific genetic or molecular interventions are more revealing with respect to the underlying  
580 mechanisms since we can be more confident about their specificity of action. Therefore our  
581 inference that insulin action does not influence fasting glucose levels is the most  
582 straightforward and parsimonious inference. Any other explanations will have to be  
583 supported by giving evidence for the assumptions made in those explanations.

584

585 The failure of experimental alteration in insulin signalling to alter steady-state glucose raises  
586 two distinct possibilities about fasting hyperglycaemia in T2D. One is that fasting  
587 hyperglycaemia in T2D is a result of processes independent of insulin signalling such as  
588 autonomic signalling or other insulin independent mechanisms. The sympathetic tone is  
589 known to be altered in metabolic syndrome (110) and increased sensitivity of liver to  
590 sympathetic signal is likely to be mainly responsible to fasting hyperglycaemia (111). The  
591 other possibility is that with impaired insulin signalling overnight fasting is not sufficient to

592 reach a steady state, therefore fasting hyperglycaemia in T2D is a non-steady-state  
593 phenomenon in type 2 diabetes. The considerably weaker but still significant correlation  
594 between glucose and insulin in fasting as compared to post glucose load data suggests that  
595 both the factors are likely to be operational differentially in different individuals.  
596  
597 In either case certain fundamental concepts in our understanding of T2D need to be revised.  
598 First of all, the definition and measurement of insulin resistance using steady-state glucose  
599 and insulin levels needs to be questioned. Most commonly used indices of insulin resistance  
600 are based on the assumption that insulin signalling decides the fasting steady-state glucose  
601 levels, although non-equilibrium methods of assessing insulin resistance have been described  
602 (112). In the classical view other mechanisms of glucose regulation are assumed to be absent  
603 or non-significant. If increased sympathetic signalling increases liver glucose production,  
604 HOMA-IR will still account it as “insulin resistance”. The same is true about insulin  
605 resistance measured by hyperinsulinemic euglycemic clamp. The way insulin resistance is  
606 measured at the clinical level eliminates the chance of separately accounting for other  
607 mechanisms of glucose regulation. Even when experiments show that certain agents affect  
608 glucose dynamics independent of insulin action, they are typically labelled as “insulin  
609 sensitizing” agents (113). As a result, the belief that insulin is the only mechanism of glucose  
610 regulation relevant to T2D is artificially strengthened. There is a subtle circularity in the  
611 working definition of insulin resistance. Insulin resistance is blamed for the failure of normal  
612 or elevated levels of insulin to regulate glucose. In order to test this hypothesis, we should  
613 have an independent definition and measure of insulin resistance. Only then we can test  
614 whether and to what extent insulin resistance can alter glucose dynamics. However,  
615 clinically insulin resistance is measured by the inability of insulin to regulate glucose. Such a  
616 measure cannot be used to test the hypothesis that insulin resistance leads to the failure of

617 insulin to regulate glucose. The unfalsifiability of the insulin resistance hypothesis arising out  
618 of this circularity has halted any attempts towards realistic assessments of the true causes of  
619 fasting hyperglycaemia in type 2 diabetes. In the molecular approach to induce insulin  
620 resistance, we have an independent definition and causality for insulin resistance and  
621 therefore such experiments are free from circularity of definition. The results of such  
622 experiments reviewed here are therefore more revealing and reliable. Since all of them  
623 converge to show that altering insulin signalling does not alter steady-state glucose levels, the  
624 insulin resistance and inadequate compensation hypothesis for steady-state hyperglycaemia  
625 stands clearly rejected.

626 The question can be turned upside down to examine whether steady-state glucose level  
627 determines steady-state insulin. If glucose is infused with a constant rate over a long time,  
628 insulin levels will come back to the baseline levels if glucose is not a determinant of fasting  
629 insulin. If it is, then insulin levels will stabilize at a new heightened steady-state level. Jetton  
630 et al. (2008) infused intra venous glucose (20% glucose w/v) continuously for 4 days in rats.  
631 Both glucose and insulin levels increased significantly after the infusion. However, later both  
632 glucose and insulin levels came back to normal even as the infusion continued. Increase in  
633 the concentration of the infused glucose (up to 35%) also yielded similar results (115). Thus,  
634 immediately on perturbation, glucose affected insulin levels, however after allowing  
635 sufficient time to regain steady state, the continued infusion of glucose had no significant  
636 effect on insulin levels. This demonstrates that even glucose does not hold a causal  
637 relationship with insulin in a steady-state whereas glucose level perturbation is certainly  
638 known to stimulate insulin response.

639

640 The interpretation of this phenomenon needs to be done at a broader philosophical level. We  
641 point out here with specific reference to homeostatic systems that the nature of causality in a



642 perturbed-state can be qualitatively different from causality in steady state. There is a simple  
643 analogue to perturbed-state versus steady-state causality in one of the basic models of  
644 mathematical biology. In the classical model of logistic growth the intrinsic growth rate  $r$   
645 decides the rate at which a population can change when away from the carrying capacity  $K$   
646 (116). However, the carrying capacity itself may be independent of the growth rate. A non-  
647 zero positive  $r$  is required to reach the steady-state at  $K$  but  $r$  does not determine the steady-  
648 state level. It is a function of  $K$  alone. Reducing  $r$  leads to delay in achieving a steady state  
649 but the steady state remains at the same position. The evidence reviewed here indicates that  
650 insulin action is analogous to  $r$  of logistic model. It is required to reach a steady-state but it  
651 does not determine the location of the steady state.

652

653 The inability to distinguish between steady-state causality and perturbed-state causality may  
654 have substantially misled biomedical research at times, T2D certainly being an important  
655 example. This poses an important philosophical as well as methodological problem in  
656 experimental physiology. Many systems in physiology have homeostatic steady states and we  
657 use experimental approaches to reveal them. However, most experiments are perturbation  
658 experiments and we may be making the mistake of applying the demonstrated perturbed-state  
659 causality to understand steady-state systems. The apparent paradox can be resolved only by  
660 carefully designing and interpreting experiments. If a perturbation is momentary or transient,  
661 the results obtained would certainly reflect perturbed-state causality, but may not reflect  
662 steady-state causality. On the other hand, sustained perturbations held constant for  
663 sufficiently long to allow the system to regain a steady-state are necessary to establish steady-  
664 state causality. If upon sustainably altering a causal factor the effect variable returns to the  
665 same steady state, it reflects only perturbed-state and not steady-state causality. If, on the

666 other hand, sustained alteration in the causal factor results into an altered steady state, it  
667 indicates steady-state causality.

668 Viewed from a slightly different and more generalized angle that goes beyond homeostatic  
669 systems, we can differentiate between two types of causalities. In driver causality the causal  
670 factor is necessary to reach a destination but does not decide the destination. In navigator  
671 causality the causal factor is crucial in determining the destination, but may not be sufficient  
672 to take the system there. The evidence reviewed above indicates that insulin is a driver but  
673 not a navigator of glucose homeostasis. A non-zero level of insulin is required for reaching a  
674 homeostatic steady state. In type 1 diabetes, the almost complete absence of insulin prevents  
675 glucose homeostasis. In type 2 diabetes there are non-zero insulin levels and therefore, a  
676 steady-state is possible, but insulin itself plays little role in deciding the steady-state glucose  
677 level. It is more likely that neuronal and other hormonal-metabolic factors affect the steady-  
678 state glucose in T2D.

679 Certain kinds of experimental interventions are unable to distinguish between driver versus  
680 navigator causality. Knocking out a driver or a navigator will disable the journey to the  
681 destination. Therefore, complete knockout of a cause may not distinguish between driver and  
682 navigator causality. On the other hand, experiments quantitatively altering the level of the  
683 causal factor while keeping it non-zero and observing the effect for sufficiently long duration,  
684 can help us differentiate between drivers and navigators. A sub-normal driver will delay the  
685 time to destination but will not change the destination. On the other hand, changing the  
686 navigator may or may not alter the time, but will alter the position of the destination. The  
687 history of insulin research is that early experiments such as total pancreatectomy  
688 demonstrated the necessary role of insulin in glucose homeostasis but the distinction between  
689 driver or navigator causality was not even conceptually perceived. So, it was assumed that  
690 insulin does both the roles. Although the absence of correlation between fasting glucose and

691 insulin but good correlation after perturbation was noted as early as 1969 (117) but in the  
692 absence of conceptual differentiation between steady state and perturbed state causality, a  
693 clear interpretation did not emerge. Now in the presence of multiple experiments showing the  
694 precise role of insulin, we need to revive our concepts of causality. At a broader scale the  
695 insulin example warrants care in making inferences in experimental physiology, in the  
696 absence of which our understanding of the physiology of homeostatic systems can be  
697 seriously flawed.

698

#### 699 **8. Acknowledgements**

700 We would like to thank Prof. Raj Bhopal, University of Edinburgh for providing clinical data  
701 from the Newcastle Heart Project. We would also like to thank Prof. Chittaranjan Yajnik,  
702 KEM Hospital, Pune for providing the clinical data from the CRISIS study. We are  
703 immensely grateful for the critical and insightful comments they provided on the earlier  
704 version of the manuscript. We would also like to thank Geetanjali Nerurkar for her help  
705 during the animal experiments.

706

#### 707 **9. Conflict of interest statement**

708 There was no specific funding for this study. The authors have no conflicts of interest to  
709 declare.

## 710 References

- 711 1. Bernard C. Leçons de physiologie opératoire. Libr J-B Baillie fils. 1879;650.
- 712 2. Mering J von J, Minkowski O. Diabetes mellitus nach Pankreasexstirpation. Vogel, Leipzig. 1890;28.
- 713 3. Karamitsos DT. The story of insulin discovery. *Diabetes Res Clin Pract* [Internet]. 2011 Aug;93:S2–8.
- 714 Available from: <https://linkinghub.elsevier.com/retrieve/pii/S0168822711700079>
- 715 4. Butler AE, Janson J, Bonner-Weir S, Ritzel R, Rizza RA, Butler PC. -Cell Deficit and Increased -Cell
- 716 Apoptosis in Humans With Type 2 Diabetes. *Diabetes* [Internet]. 2003 Jan 1;52(1):102–10. Available
- 717 from: <http://diabetes.diabetesjournals.org/cgi/doi/10.2337/diabetes.52.1.102>
- 718 5. Porte D, Kahn SE. Beta-cell dysfunction and failure in type 2 diabetes: potential mechanisms. *Diabetes*
- 719 [Internet]. 2001 Feb 1;50(Supplement 1):S160–3. Available from:
- 720 <http://diabetes.diabetesjournals.org/cgi/doi/10.2337/diabetes.50.2007.S160>
- 721 6. Clark A, Saad MF, Nezzet T, Uren C, Knowler WC, Bennett PH, et al. Islet amyloid polypeptide in
- 722 diabetic and non-diabetic Pima Indians. *Diabetologia* [Internet]. 1990 May;33(5):285–9. Available
- 723 from: <http://link.springer.com/10.1007/BF00403322>
- 724 7. Corkey BE. Banting Lecture 2011: Hyperinsulinemia: Cause or Consequence? *Diabetes* [Internet]. 2012
- 725 Jan 1;61(1):4–13. Available from: <http://diabetes.diabetesjournals.org/cgi/doi/10.2337/db11-1483>
- 726 8. Pories WJ, Dohm GL. Diabetes: Have We Got It All Wrong?: Hyperinsulinism as the culprit: surgery
- 727 provides the evidence. *Diabetes Care* [Internet]. 2012 Dec 1;35(12):2438–42. Available from:
- 728 <http://care.diabetesjournals.org/cgi/doi/10.2337/dc12-0684>
- 729 9. Watve M. *Doves, Diplomats, and Diabetes* [Internet]. New York, NY: Springer New York; 2013.
- 730 Available from: <http://link.springer.com/10.1007/978-1-4614-4409-1>
- 731 10. Meinert CL, Knatterud GL, Prout TE, Klimt CR. A study of the effects of hypoglycemic agents on
- 732 vascular complications in patients with adult-onset diabetes. II. Mortality results. *Diabetes* [Internet].
- 733 1970;19:Suppl:789-830. Available from: <http://www.ncbi.nlm.nih.gov/pubmed/4926376>
- 734 11. King P, Peacock I, Donnelly R. The UK Prospective Diabetes Study (UKPDS): clinical and therapeutic
- 735 implications for type 2 diabetes. *Br J Clin Pharmacol* [Internet]. 2001 Dec 24;48(5):643–8. Available
- 736 from: <http://doi.wiley.com/10.1046/j.1365-2125.1999.00092.x>
- 737 12. UK Prospective Diabetes Study Group. Tight blood pressure control and risk of macrovascular and
- 738 microvascular complications in type 2 diabetes: UKPDS 38. *BMJ* [Internet]. 1998 Sep
- 739 12;317(7160):703–13. Available from: <http://www.bmj.com/cgi/doi/10.1136/bmj.317.7160.703>
- 740 13. UK Prospective Diabetes Study Group. United Kingdom Prospective Diabetes Study 24: A 6-Year,
- 741 Randomized, Controlled Trial Comparing Sulfonylurea, Insulin, and Metformin Therapy in Patients
- 742 with Newly Diagnosed Type 2 Diabetes That Could Not Be Controlled with Diet Therapy. *Ann Intern*
- 743 *Med* [Internet]. 1998 Feb 1;128(3):165. Available from:
- 744 <http://annals.org/article.aspx?doi=10.7326/0003-4819-128-3-199802010-00001>
- 745 14. UK Prospective Diabetes Study Group. Intensive blood-glucose control with sulphonylureas or insulin
- 746 compared with conventional treatment and risk of complications in patients with type 2 diabetes
- 747 (UKPDS 33). *Lancet* [Internet]. 1998 Sep 12;352(9131):837–53. Available from:
- 748 <http://www.ncbi.nlm.nih.gov/pubmed/9742976>
- 749 15. ACCORD. Effects of Intensive Glucose Lowering in Type 2 Diabetes. *N Engl J Med* [Internet]. 2008
- 750 Jun 12;358(24):2545–59. Available from: <http://www.nejm.org/doi/abs/10.1056/NEJMoa0802743>
- 751 16. Nonogaki K. New insights into sympathetic regulation of glucose and fat metabolism. *Diabetologia*
- 752 [Internet]. 2000 May 2;43(5):533–49. Available from: <http://link.springer.com/10.1007/s001250051341>
- 753 17. Schwartz MW. Diabetes, Obesity, and the Brain. *Science* (80- ) [Internet]. 2005 Jan 21;307(5708):375–
- 754 9. Available from: <http://www.sciencemag.org/cgi/doi/10.1126/science.1104344>
- 755 18. Kuo T, McQueen A, Chen T-C, Wang J-C. Regulation of Glucose Homeostasis by Glucocorticoids. In
- 756 2015. p. 99–126. Available from: [http://link.springer.com/10.1007/978-1-4939-2895-8\\_5](http://link.springer.com/10.1007/978-1-4939-2895-8_5)
- 757 19. Di Dalmazi G, Pagotto U, Pasquali R, Vicennati V. Glucocorticoids and Type 2 Diabetes: From
- 758 Physiology to Pathology. *J Nutr Metab* [Internet]. 2012;2012:1–9. Available from:
- 759 <http://www.hindawi.com/journals/jnme/2012/525093/>
- 760 20. Goldstein RE, Wasserman DH, McGuinness OP, Lacy DB, Cherrington AD, Abumrad NN. Effects of
- 761 chronic elevation in plasma cortisol on hepatic carbohydrate metabolism. *Am J Physiol Metab*
- 762 [Internet]. 1993 Jan;264(1):E119–27. Available from:
- 763 <http://www.physiology.org/doi/10.1152/ajpendo.1993.264.1.E119>
- 764 21. Gathercole LL, Stewart PM. Targeting the pre-receptor metabolism of cortisol as a novel therapy in
- 765 obesity and diabetes. *J Steroid Biochem Mol Biol* [Internet]. 2010 Oct;122(1–3):21–7. Available from:
- 766 <https://linkinghub.elsevier.com/retrieve/pii/S0960076010001597>
- 767 22. Caruthers A, DeZutter J, Ganguly A, Devaskar SU. Will the original glucose transporter isoform please
- 768 stand up! *Am J Physiol Metab* [Internet]. 2009 Oct;297(4):E836–48. Available from:
- 769 <http://www.physiology.org/doi/10.1152/ajpendo.00496.2009>

- 770 23. Clemmons DR. Role of Insulin-Like Growth Factor I in Maintaining Normal Glucose Homeostasis.  
771 *Horm Res Paediatr* [Internet]. 2004;62(1):77–82. Available from:  
772 <https://www.karger.com/Article/FullText/80763>
- 773 24. Jansen C, Lundquist I, Salehi A, Axelson J, Ohlsson B. Does Epidermal Growth Factor Participate in  
774 the Regulation of Glucose, Insulin and Glucagon Levels? *Eur Surg Res* [Internet]. 2006;38(4):377–84.  
775 Available from: <https://www.karger.com/Article/FullText/94533>
- 776 25. Messmer-Blust AF, Philbrick MJ, Guo S, Wu J, He P, Guo S, et al. RTEF-1 Attenuates Blood Glucose  
777 Levels by Regulating Insulin-Like Growth Factor Binding Protein-1 in the Endothelium. *Circ Res*  
778 [Internet]. 2012 Sep 28;111(8):991–1001. Available from:  
779 <https://www.ahajournals.org/doi/10.1161/CIRCRESAHA.112.268110>
- 780 26. Suh JM, Jonker JW, Ahmadian M, Goetz R, Lackey D, Osborn O, et al. Endocrinization of FGF1  
781 produces a neomorphic and potent insulin sensitizer. *Nature* [Internet]. 2014 Sep 16;513(7518):436–9.  
782 Available from: <http://www.nature.com/articles/nature13540>
- 783 27. Kulkarni S, Sharda S, Watve M. Bi-stability in type 2 diabetes mellitus multi-organ signalling network.  
784 Cras-Méneur C, editor. *PLoS One* [Internet]. 2017 Aug 2;12(8):e0181536. Available from:  
785 <https://dx.plos.org/10.1371/journal.pone.0181536>
- 786 28. Turner RC, Holman RR, Matthews D, Hockaday TDR, Peto J. Insulin deficiency and insulin resistance  
787 interaction in diabetes: Estimation of their relative contribution by feedback analysis from basal plasma  
788 insulin and glucose concentrations. *Metabolism* [Internet]. 1979 Nov;28(11):1086–96. Available from:  
789 <http://linkinghub.elsevier.com/retrieve/pii/002604957990146X>
- 790 29. Matthews DR, Hosker JP, Rudenski AS, Naylor BA, Treacher DF, Turner RC. Homeostasis model  
791 assessment: insulin resistance and  $\beta$ -cell function from fasting plasma glucose and insulin  
792 concentrations in man. *Diabetologia* [Internet]. 1985 Jul;28(7):412–9. Available from:  
793 <http://link.springer.com/10.1007/BF00280883>
- 794 30. Chawla S, Pund A, B. V, Kulkarni S, Diwekar-Joshi M, Watve M. Inferring causal pathways among  
795 three or more variables from steady-state correlations in a homeostatic system. Ruscica M, editor. *PLoS*  
796 *One* [Internet]. 2018 Oct 11;13(10):e0204755. Available from:  
797 <http://dx.plos.org/10.1371/journal.pone.0204755>
- 798 31. AKHTAR A. The Flaws and Human Harms of Animal Experimentation. *Cambridge Q Healthc Ethics*  
799 [Internet]. 2015 Oct 14;24(04):407–19. Available from:  
800 [http://www.journals.cambridge.org/abstract\\_S0963180115000079](http://www.journals.cambridge.org/abstract_S0963180115000079)
- 801 32. Ali Z, Chandrasekera PC, Pippin JJ. Animal research for type 2 diabetes mellitus, its limited translation  
802 for clinical benefit, and the way forward. *Altern Lab Anim* [Internet]. 2018 Mar;46(1):13–22. Available  
803 from: <http://www.ncbi.nlm.nih.gov/pubmed/29553794>
- 804 33. Bracken MB. Why animal studies are often poor predictors of human reactions to exposure. *J R Soc*  
805 *Med* [Internet]. 2009 Mar 18;102(3):120–2. Available from:  
806 <http://journals.sagepub.com/doi/10.1258/jrsm.2008.08k033>
- 807 34. Bevan P. Insulin signalling. *J Cell Sci* [Internet]. 2001 Apr;114(Pt 8):1429–30. Available from:  
808 <http://www.ncbi.nlm.nih.gov/pubmed/11282018>
- 809 35. Bock G, Chittilapilly E, Basu R, Toffolo G, Cobelli C, Chandramouli V, et al. Contribution of Hepatic  
810 and Extrahepatic Insulin Resistance to the Pathogenesis of Impaired Fasting Glucose: Role of Increased  
811 Rates of Gluconeogenesis. *Diabetes* [Internet]. 2007 Jun 1;56(6):1703–11. Available from:  
812 <http://diabetes.diabetesjournals.org/cgi/doi/10.2337/db06-1776>
- 813 36. Lauro D, Kido Y, Castle a L, Zarnowski MJ, Hayashi H, Ebina Y, et al. Impaired glucose tolerance in  
814 mice with a targeted impairment of insulin action in muscle and adipose tissue. *Nat Genet*.  
815 1998;20(3):294–8.
- 816 37. Guerra C, Navarro P, Valverde AM, Arribas M, Brüning J, Kozak LP, et al. Brown adipose tissue –  
817 specific insulin receptor knockout shows diabetic phenotype without insulin resistance. *J Clin Invest*.  
818 2001;108(8):1205–13.
- 819 38. Wojtaszewski JFP, Higaki Y, Hirshman MF, Michael MD, Dufresne SD, Kahn CR, et al. Exercise  
820 modulates postreceptor insulin signaling and glucose transport in muscle-specific insulin receptor  
821 knockout mice. *J Clin Invest*. 1999;
- 822 39. Mauvais-Jarvis F, Virkamaki A, Michael MD, Winnay JN, Zisman A, Kulkarni RN, et al. A model to  
823 explore the interaction between muscle insulin resistance and beta-cell dysfunction in the development  
824 of type 2 diabetes. *Diabetes*. 2000;
- 825 40. Blüher M, Michael MD, Peroni OD, Ueki K, Carter N, Kahn BB, et al. Adipose tissue selective insulin  
826 receptor knockout protects against obesity and obesity-related glucose intolerance. *Dev Cell*. 2002;
- 827 41. Otani K. Reduced  $\beta$ -cell mass and altered glucose sensing impair insulin-secretory function in IRKO  
828 mice. *AJP Endocrinol Metab*. 2003;
- 829 42. Cohen SE, Tseng YH, Michael MD, Kahn CR. Effects of insulin-sensitising agents in mice with hepatic



- 830 insulin resistance. *Diabetologia*. 2004;
- 831 43. Okada T, Liew CW, Hu J, Hinault C, Michael MD, Krtzfeldt J, et al. Insulin receptors in beta-cells are  
832 critical for islet compensatory growth response to insulin resistance. *Proc Natl Acad Sci U S A*  
833 [Internet]. 2007 May 22;104(21):8977–82. Available from:  
834 <http://www.ncbi.nlm.nih.gov/pubmed/17416680>
- 835 44. Ealey KN, Lu S, Lau D, Archer MC. Reduced susceptibility of muscle-specific insulin receptor  
836 knockout mice to colon carcinogenesis. *Am J Physiol Gastrointest Liver Physiol*. 2008;294(3):G679–86.
- 837 45. Escribano O, Guillen C, Nevado C, Gomez-Hernandez A, Kahn CR, Benito M. Role of a Liver-  
838 Pancreas Endocrine Axis Through Insulin Receptor A Isoform. *Diabetes*. 2009;58(April):820–8.
- 839 46. Kawamori D, Kurpad AJ, Hu J, Liew CW, Shih JL, Ford EL, et al. Insulin Signaling in  $\alpha$  Cells  
840 Modulates Glucagon Secretion In Vivo. *Cell Metab* [Internet]. 2009 Apr;9(4):350–61. Available from:  
841 <http://www.ncbi.nlm.nih.gov/pmc/articles/PMC2694613/pdf/nihms109119.pdf>
- 842 47. Haas JT, Miao J, Chanda D, Wang Y, Zhao E, Haas ME, et al. Hepatic Insulin Signaling Is Required for  
843 Obesity-Dependent Expression of SREBP-1c mRNA but Not for Feeding-Dependent Expression. *Cell*  
844 *Metab* [Internet]. 2012 Jun;15(6):873–84. Available from:  
845 <http://linkinghub.elsevier.com/retrieve/pii/S1550413112001957>
- 846 48. Softic S, Boucher J, Solheim MH, Fujisaka S, Haering MF, Homan EP, et al. Lipodystrophy due to  
847 adipose tissue-specific insulin receptor knockout results in progressive NAFLD. *Diabetes*.  
848 2016;65(8):2187–200.
- 849 49. Sakaguchi M, Fujisaka S, Cai W, Winnay JN, Konishi M, O'Neill BT, et al. Adipocyte Dynamics and  
850 Reversible Metabolic Syndrome in Mice with an Inducible Adipocyte-Specific Deletion of the Insulin  
851 Receptor. *Cell Metab*. 2017;25(2):448–62.
- 852 50. Brüning JC, Michael MD, Winnay JN, Hayashi T, Hörsch D, Accili D, et al. A muscle-specific insulin  
853 receptor knockout exhibits features of the metabolic syndrome of NIDDM without altering glucose  
854 tolerance. *Mol Cell*. 1998;
- 855 51. Dodson Michael M, Kulkarni RN, Postic C, Previs SF, Shulman GI, Magnuson MA, et al. Loss of  
856 Insulin Signaling in Hepatocytes Leads to Severe Insulin Resistance and Progressive Hepatic  
857 Dysfunction. *Mol Cell*. 2000;6:87–97.
- 858 52. Johnson ME, Das NM, Butcher FR, Fain JN. The regulation of gluconeogenesis in isolated rat liver cells  
859 by glucagon, insulin, dibutyl cyclic adenosine monophosphate, and fatty acids. *J Biol Chem* [Internet].  
860 1972 May 25;247(10):3229–35. Available from: <http://www.ncbi.nlm.nih.gov/pubmed/4337509>
- 861 53. Hulse RE, Ralat LA, Wei Jen T. Chapter 22 Structure, Function, and Regulation of Insulin-Degrading  
862 Enzyme. In 2009. p. 635–48. Available from:  
863 <https://linkinghub.elsevier.com/retrieve/pii/S0083672908006225>
- 864 54. Shen Y, Joachimiak A, Rich Rosner M, Tang W-J. Structures of human insulin-degrading enzyme  
865 reveal a new substrate recognition mechanism. *Nature* [Internet]. 2006 Oct 11;443(7113):870–4.  
866 Available from: <http://www.nature.com/articles/nature05143>
- 867 55. Duckworth WC, Bennett RG, Hamel FG. Insulin Degradation: Progress and Potential 1. *Endocr Rev*  
868 [Internet]. 1998 Oct;19(5):608–24. Available from: [https://academic.oup.com/edrv/article-](https://academic.oup.com/edrv/article-lookup/doi/10.1210/edrv.19.5.0349)  
869 [lookup/doi/10.1210/edrv.19.5.0349](https://academic.oup.com/edrv/article-lookup/doi/10.1210/edrv.19.5.0349)
- 870 56. Authier F, Posner BI, Bergeron JJ. Insulin-degrading enzyme. *Clin Invest Med* [Internet]. 1996  
871 Jun;19(3):149–60. Available from: <http://www.ncbi.nlm.nih.gov/pubmed/8724818>
- 872 57. Hulse RE, Ralat L a, Wei-Jen T. Structure, function, and regulation of insulin-degrading enzyme. *Vitam*  
873 *Horm*. 2009;80(08):635–48.
- 874 58. Tomasi T, Sledz D, Wales JK, Recant L. Insulin Half-Life in Normal and Diabetic Subjects. *Exp Biol*  
875 *Med* [Internet]. 1967 Oct 1;126(1):315–7. Available from:  
876 <http://ebm.sagepub.com/lookup/doi/10.3181/00379727-126-43434>
- 877 59. Maianti JP, McFedries A, Foda ZH, Kleiner RE, Du XQ, Leissring MA, et al. Anti-diabetic activity of  
878 insulin-degrading enzyme inhibitors mediated by multiple hormones. *Nature* [Internet].  
879 2014;511(7507):94–8. Available from: <http://dx.doi.org/10.1038/nature13297>
- 880 60. Costes S, Butler PC. Insulin-Degrading Enzyme Inhibition, a Novel Therapy for Type 2 Diabetes? *Cell*  
881 *Metab* [Internet]. 2014 Aug;20(2):201–3. Available from:  
882 <http://www.ncbi.nlm.nih.gov/pubmed/19772347>
- 883 61. Panten U, Burgfeld J, Goerke F, Rennie M, Schwannstecher M, Wallasch A, et al. Control of insulin  
884 secretion by sulfonylureas, meglitinide and diazoxide in relation to their binding to the sulfonylurea  
885 receptor in pancreatic islets. *Biochem Pharmacol* [Internet]. 1989 Apr;38(8):1217–29. Available from:  
886 <http://linkinghub.elsevier.com/retrieve/pii/0006295289903274>
- 887 62. Doyle ME. Pharmacological Agents That Directly Modulate Insulin Secretion. *Pharmacol Rev*  
888 [Internet]. 2003 Mar 1;55(1):105–31. Available from:  
889 <http://pharmrev.aspetjournals.org/cgi/doi/10.1124/pr.55.1.7>

- 890 63. Lamberts SWJ, van der Lely A-J, de Herder WW, Hofland LJ. Octreotide. Wood AJJ, editor. *N Engl J*  
891 *Med* [Internet]. 1996 Jan 25;334(4):246–54. Available from:  
892 <http://www.nejm.org/doi/10.1056/NEJM199601253340408>
- 893 64. Farris W, Mansourian S, Chang Y, Lindsley L, Eckman EA, Frosch MP, et al. Insulin-degrading  
894 enzyme regulates the levels of insulin, amyloid beta-protein, and the beta-amyloid precursor protein  
895 intracellular domain in vivo. *Proc Natl Acad Sci U S A* [Internet]. 2003;100(7):4162–7. Available from:  
896 <http://www.ncbi.nlm.nih.gov/pubmed/12634421>  
897 <http://www.ncbi.nlm.nih.gov/pubmed/12634421>
- 898 65. Durham TB, Toth JL, Klimkowski VJ, Cao JXC, Siesky AM, Alexander-Chacko J, et al. Dual exosite-  
899 binding inhibitors of insulin-degrading enzyme challenge its role as the primary mediator of insulin  
900 clearance in vivo. *J Biol Chem*. 2015;290(33):20044–59.
- 901 66. Deprez-Poulain R, Hennuyer N, Bosc D, Liang WG, Enée E, Marechal X, et al. Catalytic site inhibition  
902 of insulin-degrading enzyme by a small molecule induces glucose intolerance in mice. *Nat Commun*.  
903 2015;6.
- 904 67. Abdul-Hay SO, Kang D, McBride M, Li L, Zhao J, Leissring MA. Deletion of insulin-degrading  
905 enzyme elicits antipodal, age-dependent effects on glucose and insulin tolerance. *PLoS One* [Internet].  
906 2011;6(6):e20818. Available from: <http://www.ncbi.nlm.nih.gov/pubmed/21695259>
- 907 68. Villa-Pérez P, Merino B, Fernández-Díaz CM, Ciudad P, Lobatón CD, Moreno A, et al. Liver-specific  
908 ablation of insulin-degrading enzyme causes hepatic insulin resistance and glucose intolerance, without  
909 affecting insulin clearance in mice. *Metabolism* [Internet]. 2018;88:1–11. Available from:  
910 <https://www.sciencedirect.com/science/article/pii/S0026049518301690>
- 911 69. Wigand JP, Blackard WG. Downregulation of insulin receptors in obese man. *Diabetes*.  
912 1979;28(4):287–91.
- 913 70. Leahy JL, Bumbalo LM, Chen C. Diazoxide causes recovery of beta-cell glucose responsiveness in 90%  
914 pancreatectomized diabetic rats. *Diabetes* [Internet]. 1994 Feb;43(2):173–9. Available from:  
915 <http://doi.wiley.com/10.1046/j.1464-5491.1999.00150.x>
- 916 71. Matsuda M, Kawasaki F, Mikami Y, Takeuchi Y, Saito M, Eto M, et al. Rescue of beta-cell exhaustion  
917 by diazoxide after the development of diabetes mellitus in rats with streptozotocin-induced diabetes. *Eur*  
918 *J Pharmacol*. 2002;453(1):141–8.
- 919 72. Schreuder T, Karreman M, Rennings A, Ruinemans-Koerts J, Jansen M, de Boer H. Diazoxide-  
920 mediated insulin suppression in obese men: a dose-response study. *Diabetes Obes Metab* [Internet].  
921 2005 May;7(3):239–45. Available from: <http://www.ncbi.nlm.nih.gov/pubmed/15811140>
- 922 73. Due A, Flint A, Eriksen G, Møller B, Raben A, Hansen JB, et al. No effect of inhibition of insulin  
923 secretion by diazoxide on weight loss in hyperinsulinaemic obese subjects during an 8-week weight-loss  
924 diet. *Diabetes, Obes Metab*. 2007;9(4):566–74.
- 925 74. van Boekel G, Loves S, van Sorge A, Ruinemans-Koerts J, Rijnders T, de Boer H. Weight loss in obese  
926 men by caloric restriction and high-dose diazoxide-mediated insulin suppression. *Diabetes, Obes Metab*.  
927 2008;10(12):1195–203.
- 928 75. Ramanathan RP, Arbeláez AM, Cryer PE. Partial inhibition of insulin secretion results in glucose  
929 intolerance but not hyperglucagonemia. *Diabetes*. 2011;60(4):1324–8.
- 930 76. Brauner R, Serreau R, Souberbielle JC, Pouillot M, Grouazel S, Recasens C, et al. Diazoxide in children  
931 with obesity after hypothalamic-pituitary lesions: A randomized, placebo-controlled trial. *J Clin*  
932 *Endocrinol Metab*. 2016;101(12):4825–33.
- 933 77. Breckenridge SM, Cooperberg BA, Arbelaez AM, Patterson BW, Cryer PE. Glucagon, in concert with  
934 insulin, supports the postabsorptive plasma glucose concentration in humans. *Diabetes*.  
935 2007;56(10):2442–8.
- 936 78. Candrina R, Gussago A, Giustina G. Effect of a new long-acting somatostatin analogue (SMS 201–995)  
937 on glycemic and hormonal response to a mixed meal in acromegalic patients. *J Endocrinol Invest*.  
938 1988;11(1):21–6.
- 939 79. Davies RR, Miller M, Turner SJ, Watson M, McGill A, Orskov H, et al. Effects of somatostatin  
940 analogue SMS 201-995 in non-insulin-dependent diabetes. *Clin Endocrinol (Oxf)*. 1986;25(6):739–47.
- 941 80. Giustina A, Girelli A, Buffoli MG, Cimino A, Legati F, Valentini U, et al. Low-dose octreotide is able  
942 to cause a maximal inhibition of the glycemic responses to a mixed meal in obese type 2 diabetic  
943 patients treated with insulin. *Diabetes Res Clin Pract*. 1991;14(1):47–54.
- 944 81. Johnston DG, Davies RR, Alberti KGMM, Miller M, Turner SJ, Watson M, et al. Effects of SMS 201-  
945 995 on intermediary metabolism and endocrine status in normal and diabetic humans. *Am J Med*.  
946 1986;81(6 SUPPL. 2):88–93.
- 947 82. Madsen M, Poulsen PL, Ørskov H, Møller N, Jørgensen JOL. Cotreatment with pegvisomant and a  
948 Somatostatin Analog (SA) in SA-responsive acromegalic patients. *J Clin Endocrinol Metab*.  
949 2011;96(8):2405–13.
- 949 83. Parkinson C, Drake WM, Roberts ME, Meeran K, Besser GM, Trainer PJ. A comparison of the effects

- 950 of pegvisomant and octreotide on glucose, insulin, gastrin, cholecystokinin, and pancreatic polypeptide  
951 responses to oral glucose and a standard mixed meal. *J Clin Endocrinol Metab.* 2002;87(4):1797–804.
- 952 84. Ronchi C, Epaminonda P, Cappiello V, Beck-Peccoz P, Arosio M. Effects of two different somatostatin  
953 analogs on glucose tolerance in acromegaly. *J Endocrinol Invest* [Internet]. 2002 Jun 22;25(6):502–7.  
954 Available from: <http://link.springer.com/10.1007/BF03345491>
- 955 85. Williams G, Fuessl HS, Burrin JM, Chilvers E, Bloom SR. Postprandial glycaemic effects of a long-  
956 acting somatostatin analogue (octreotide) in non-insulin dependent diabetes mellitus. *Horm Metab Res.*  
957 1988;20(3):168–70.
- 958 86. Williams G, Fuessl H, Kraenzlin M, Bloom SR. Postprandial effects of SMS 201-995 on gut hormones  
959 and glucose tolerance. *Scand J Gastroenterol.* 1986;21(S119):73–83.
- 960 87. Scheingart DE, McKenzie AK, Victoria RS, Tsao HS. Suppression of insulin secretion by protein  
961 deprivation in obesity. *Metabolism.* 1979;28(9):943–9.
- 962 88. Hwang D, Seo S, Kim Y, Kim C, Shim S, Jee S, et al. Significant change in insulin production, glucose  
963 tolerance and ER stress signaling in transgenic mice coexpressing insulin-siRNA and human IDE. *Int J*  
964 *Mol Med* [Internet]. 2007 Jan 1; Available from: [http://www.spandidos-](http://www.spandidos-publications.com/10.3892/ijmm.19.1.65)  
965 [publications.com/10.3892/ijmm.19.1.65](http://www.spandidos-publications.com/10.3892/ijmm.19.1.65)
- 966 89. Duvillie B, Cordonnier N, Deltour L, Dandoy-Dron F, Itier J-M, Monthieux E, et al. Phenotypic  
967 alterations in insulin-deficient mutant mice. *Proc Natl Acad Sci* [Internet]. 1997 May 13;94(10):5137–  
968 40. Available from: <http://www.pnas.org/cgi/doi/10.1073/pnas.94.10.5137>
- 969 90. Mehran AE, Templeman NM, Brigidi GS, Lim GE, Chu K, Hu X, et al. Hyperinsulinemia Drives Diet-  
970 Induced Obesity Independently of Brain Insulin Production. *Cell Metab* [Internet]. 2012;16(6):723–37.  
971 Available from: <http://dx.doi.org/10.1016/j.cmet.2012.10.019>
- 972 91. Page MM, Skovsø S, Cen H, Chiu AP, Dionne DA, Hutchinson DF, et al. Reducing insulin via  
973 conditional partial gene ablation in adults reverses diet-induced weight gain. 2019;
- 974 92. Templeman NM, Clee SM, Johnson JD. Suppression of hyperinsulinaemia in growing female mice  
975 provides long-term protection against obesity. 2015;2392–402.
- 976 93. Dionne DA, Skovsø S, Templeman NM, Clee SM, Johnson JD. Caloric restriction paradoxically  
977 increases adiposity in Mice With Genetically Reduced Insulin. 2016;157(July):2724–34.
- 978 94. Templeman NM, Flibotte S, Chik JHL, Foster LJ, Nislow C, Johnson JD, et al. Reduced Circulating  
979 Insulin Enhances Insulin Sensitivity in Old Mice and Extends Lifespan. *CellReports* [Internet].  
980 2017;20(2):451–63. Available from: <http://dx.doi.org/10.1016/j.celrep.2017.06.048>
- 981 95. Halter JB, Ward WK, Porte D, Best JD, Pfeifer MA. Glucose regulation in non-insulin-dependent  
982 diabetes mellitus. Interaction between pancreatic islets and the liver. *Am J Med* [Internet]. 1985 Aug  
983 23;79(2B):6–12. Available from: <http://www.ncbi.nlm.nih.gov/pubmed/2863979>
- 984 96. Lerner RL, Porte D. Acute and steady-state insulin responses to glucose in nonobese diabetic subjects. *J*  
985 *Clin Invest* [Internet]. 1972 Jul 1;51(7):1624–31. Available from:  
986 <http://www.jci.org/articles/view/106963>
- 987 97. Palumbo P, Ditlevsen S, Bertuzzi A, De Gaetano A. Mathematical modeling of the glucose–insulin  
988 system: A review. *Math Biosci* [Internet]. 2013 Aug;244(2):69–81. Available from:  
989 <https://linkinghub.elsevier.com/retrieve/pii/S0025556413001302>
- 990 98. Bergman RN. Toward Physiological Understanding of Glucose Tolerance: Minimal-Model Approach.  
991 *Diabetes* [Internet]. 1989 Dec 1;38(12):1512–27. Available from:  
992 <http://diabetes.diabetesjournals.org/cgi/doi/10.2337/diab.38.12.1512>
- 993 99. Bergman RN. Minimal Model: Perspective from 2005. *Horm Res Paediatr* [Internet]. 2005;64(3):8–15.  
994 Available from: <https://www.karger.com/Article/FullText/89312>
- 995 100. Makroglou A, Li J, Kuang Y. Mathematical models and software tools for the glucose-insulin regulatory  
996 system and diabetes: an overview. *Appl Numer Math* [Internet]. 2006 Mar;56(3–4):559–73. Available  
997 from: <http://linkinghub.elsevier.com/retrieve/pii/S0168927405000929>
- 998 101. Coggan AR. Plasma Glucose Metabolism During Exercise in Humans. *Sport Med* [Internet]. 1991  
999 Feb;11(2):102–24. Available from: <http://link.springer.com/10.2165/00007256-199111020-00003>
- 1000 102. Roy A, Parker RS. DYNAMIC MODELING OF EXERCISE EFFECTS ON PLASMA GLUCOSE  
1001 AND INSULIN LEVELS. *IFAC Proc Vol* [Internet]. 2006;39(2):509–14. Available from:  
1002 <https://linkinghub.elsevier.com/retrieve/pii/S1474667016353757>
- 1003 103. Garvey WT, Olefsky JM, Marshall S. Insulin Induces Progressive Insulin Resistance in Cultured Rat  
1004 Adipocytes: Sequential Effects at Receptor and Multiple Postreceptor Sites. *Diabetes* [Internet]. 1986  
1005 Mar 1;35(3):258–67. Available from: <http://diabetes.diabetesjournals.org/cgi/doi/10.2337/diab.35.3.258>
- 1006 104. Shanik MH, Xu Y, Skrha J, Dankner R, Zick Y, Roth J. Insulin Resistance and Hyperinsulinemia: Is  
1007 hyperinsulinemia the cart or the horse? *Diabetes Care* [Internet]. 2008 Feb 1;31(Supplement 2):S262–8.  
1008 Available from: <http://care.diabetesjournals.org/cgi/doi/10.2337/dc08-s264>
- 1009 105. Weyer C, Hanson RL, Tataranni PA, Bogardus C, Pratley RE. A high fasting plasma insulin



- 1010 concentration predicts type 2 diabetes independent of insulin resistance: evidence for a pathogenic role  
1011 of relative hyperinsulinemia. *Diabetes* [Internet]. 2000 Dec 1;49(12):2094–101. Available from:  
1012 <http://diabetes.diabetesjournals.org/cgi/doi/10.2337/diabetes.49.12.2094>
- 1013 106. Yajnik CS, Joglekar C V., Lubree HG, Rege SS, Naik SS, Bhat DS, et al. Adiposity, inflammation and  
1014 hyperglycaemia in rural and urban Indian men: Coronary Risk of Insulin Sensitivity in Indian Subjects  
1015 (CRISIS) Study. *Diabetologia* [Internet]. 2007 Nov 29;51(1):39–46. Available from:  
1016 <http://link.springer.com/10.1007/s00125-007-0847-1>
- 1017 107. Bhopal R, Unwin N, White M, Yallop J, Walker L, Alberti KGMM, et al. Heterogeneity of coronary  
1018 heart disease risk factors in Indian, Pakistani, Bangladeshi, and European origin populations: cross  
1019 sectional study. *BMJ* [Internet]. 1999 Jul 24;319(7204):215–20. Available from:  
1020 <http://www.bmj.com/cgi/doi/10.1136/bmj.319.7204.215>
- 1021 108. Bhopal RS. A four-stage model explaining the higher risk of Type 2 diabetes mellitus in South Asians  
1022 compared with European populations. *Diabet Med* [Internet]. 2013 Jan;30(1):35–42. Available from:  
1023 <http://doi.wiley.com/10.1111/dme.12016>
- 1024 109. Gujral UP, Pradeepa R, Weber MB, Narayan K MV, Mohan V. Type 2 diabetes in South Asians:  
1025 similarities and differences with white Caucasian and other populations. *Ann N Y Acad Sci* [Internet].  
1026 2013 Apr;1281(1):51–63. Available from: <http://doi.wiley.com/10.1111/j.1749-6632.2012.06838.x>
- 1027 110. Thorp AA, Schlaich MP. Relevance of Sympathetic Nervous System Activation in Obesity and  
1028 Metabolic Syndrome. *J Diabetes Res* [Internet]. 2015;2015:1–11. Available from:  
1029 <http://www.hindawi.com/journals/jdr/2015/341583/>
- 1030 111. Bruce DG, Chisholm DJ, Storlien LH, Kraegen EW, Smythe GA. The effects of sympathetic nervous  
1031 system activation and psychological stress on glucose metabolism and blood pressure in subjects with  
1032 Type 2 (non-insulin-dependent) diabetes mellitus. *Diabetologia* [Internet]. 1992 Sep;35(9):835–43.  
1033 Available from: <http://link.springer.com/10.1007/BF00399929>
- 1034 112. Patarrão RS, Lutt WW, Afonso RA, Ribeiro RT, Fernandes AB, Boavida JM, et al. Postprandial but  
1035 not fasting insulin resistance is an early identifier of dysmetabolism in overweight subjects. *Can J*  
1036 *Physiol Pharmacol* [Internet]. 2012 Jul;90(7):923–31. Available from:  
1037 <http://www.nrcresearchpress.com/doi/10.1139/y2012-086>
- 1038 113. Hossain Z, Valicherla GR, Gupta AP, Syed AA, Riyazuddin M, Chandra S, et al. Discovery of  
1039 pancreastatin inhibitor PST18 for the treatment of insulin resistance and diabetes: Studies in rodent  
1040 models of diabetes mellitus. *Sci Rep* [Internet]. 2018;8(1):1–13. Available from:  
1041 <http://dx.doi.org/10.1038/s41598-018-27018-8>
- 1042 114. Jetton TL, Everill B, Lausier J, Roskens V, Habibovic A, LaRock K, et al. Enhanced  $\beta$ -cell mass  
1043 without increased proliferation following chronic mild glucose infusion. *Am J Physiol Metab* [Internet].  
1044 2008 Apr;294(4):E679–87. Available from:  
1045 <http://www.physiology.org/doi/10.1152/ajpendo.00569.2007>
- 1046 115. Steil GM, Trivedi N, Jonas J-C, Hasenkamp WM, Sharma A, Bonner-Weir S, et al. Adaptation of  $\beta$ -cell  
1047 mass to substrate oversupply: enhanced function with normal gene expression. *Am J Physiol Metab*  
1048 [Internet]. 2001 May;280(5):E788–96. Available from:  
1049 <http://www.physiology.org/doi/10.1152/ajpendo.2001.280.5.E788>
- 1050 116. Gotelli NJ. *A Primer of Ecology*. 2008. Sinauer.
- 1051 117. Goodner CJ, Conway MJ, Werrbach JH. Control of insulin secretion during fasting hyperglycemia in  
1052 adult diabetics and in nondiabetic subjects during infusion of glucose. *J Clin Invest* 1969; 48: 1178-87.  
1053

1054 ***Supplementary information 1: Methods used for the meta-analyses***

1055

1056 ***Four meta-analyses were performed in this study:***

1057 1. Insulin receptor knockout

1058 2. Insulin degrading enzyme

1059 3. Insulin suppression by diazoxide

1060 4. Insulin suppression by octreotide

1061

1062 ***Methods used for the four meta-analyses:***

1063 **Keywords:** The keywords used in the meta analyses have been given in the table 1 of the  
1064 main manuscript.

1065 **Data-bases:** We have used the PubMed/MEDLINE database (and not the data bases which  
1066 report clinical trials data) since the experiments we were searching for are predominantly  
1067 experiments in basic research in life sciences as opposed to clinical studies. Majority of the  
1068 studies which were searching for were rodent studies and not human studies.

1069 **Timeline for inclusion of papers in the search:** The first search was performed in August  
1070 2017 and the papers until 31<sup>st</sup> July 2017 were included in the primary search.

1071 **Inclusion and exclusion criteria:** Given in the table 2 of the main paper

1072 **Details of the papers:** Tables 1,2,3,4 below

1073 **Methods of data extraction:** Data was extracted from the shortlisted papers using the  
1074 software WebPlotDigitizer (Author: Ankit Rohatgi

1075 Website: <https://automeris.io/WebPlotDigitizer>, Version: 4.1, January, 2018, E-Mail:

1076 [ankitrohatgi@hotmail.com](mailto:ankitrohatgi@hotmail.com), Location: Austin, Texas, USA)

1077

1078 **Principal summary measures:** The data extracted from each shortlisted paper was the  
1079 difference of means of blood/plasma glucose levels between the ‘control’ and the ‘treated’  
1080 along with the 95% confidence intervals.

1081 **Methods of handling data and combining results of studies:** These differences in the  
1082 means between the control and treated from all the respective shortlisted papers were  
1083 compiled. These differences were compared across different timepoints using the non-  
1084 parametric chi-square test.

1085

1086 **Details of the papers shortlisted for the four meta-analyses:**

1087 **Table 1:** Details of the 16 papers used in the Insulin Receptor Knock-Out (IRKO) meta-analysis. All of these studies were carried out on rodent  
 1088 models.

| Sr. No. | Reference                | Type of IRKO                                                                               | Method used to make the knockout | Fasting duration before the GTT (Glucose tolerance test) | Glucose concentration/ mode of glucose infusion used in GTT | Sample size               |
|---------|--------------------------|--------------------------------------------------------------------------------------------|----------------------------------|----------------------------------------------------------|-------------------------------------------------------------|---------------------------|
| 1       | Sakaguchi et al 2017 (1) | inducible-BATIRKO (brown adipose tissue IRKO)                                              | Cre-loxP system                  | 6 hours                                                  | 2g/kg dextrose given orally                                 | Control n=13, IRKO, n=12  |
| 2       | Softic et al 2016 (2)    | FIRKO (Fat IRKO) (12 weeks old male mice)                                                  | Cre-loxP system                  | Overnight (ON)                                           | Random fed                                                  | n=12 to 30 for each group |
|         |                          | FIRKO (52 weeks old male mice)                                                             |                                  |                                                          |                                                             | n=5 to 6 for each group   |
| 3       | Haas et al 2012 (3)      | LIRKO (Liver IRKO)                                                                         | Cre-loxP system                  | ON                                                       | 1g/kg dextrose i.p.(intraperitoneal)                        | n=3 to 5 for each group   |
| 4       | Kawamori et al 2009 (4)  | $\alpha$ IRKO ( $\alpha$ -cell IRKO) (2, 5, 12-month-old mice)                             | Cre-loxP system                  | 16 hours                                                 | Random fed                                                  | n=6 to 8 for each group   |
|         |                          | $\alpha$ IRKO (2,5-month-old mice)                                                         |                                  | 16 hours                                                 | 1g/kg dextrose i.p.                                         | n=3 to 12 for each group  |
| 5       | Escribano et al 2009 (5) | inducible LIRKO                                                                            | Cre-loxP system                  | 16 hours                                                 | 2g/kg dextrose i.p.                                         | n=10 to 20 for each group |
| 6       | Ealey et al 2008 (6)     | MIRKO (Muscle IRKO)                                                                        | Cre-loxP system                  | ON                                                       | 2g/kg dextrose i.p.                                         | n=7 to 13 for each group  |
| 7       | Okada et al 2007 (7)     | $\beta$ IRKO ( $\beta$ -cell IRKO), LIRKO and $\beta$ IRKO-LIRKO (4-5 weeks old male mice) | Cre-loxP system                  | ON                                                       | 2g/kg dextrose i.p.                                         | n=8 for each group        |

|    |                                |                                                                     |                  |          |                     |                                                 |
|----|--------------------------------|---------------------------------------------------------------------|------------------|----------|---------------------|-------------------------------------------------|
|    |                                | $\beta$ IRKO (20 weeks old, male mice; chow and HFD)                |                  |          |                     | n=9 to 16 for each group                        |
| 8  | Cohen et al 2004 (8)           | LIRKO (2-month-old mice)                                            | Cre-loxP system  | 16 hours | 2g/kg dextrose i.p. | n=17 for control<br>n=25 for LIRKO              |
| 9  | Otani et al 2004 (9)           | $\beta$ IRKO-Non-diabetic (ND)                                      | Cre-loxP system  | 4 hours  | 2g/kg dextrose i.p. | n= 35 for control,<br>n=28 for $\beta$ IRKO(ND) |
|    |                                | $\beta$ IRKO-Diabetic (D)                                           |                  |          |                     | n=10 for $\beta$ IRKO(D)                        |
| 10 | Blueher et al 2002 (10)        | FIRKO (2 month and 10-month-old mice)                               | Cre-loxP system  | 16 hours | 2g/kg dextrose i.p. | n=8 for each group                              |
| 11 | Guerra et al 2001 (11)         | BATIRKO (3,6 and 9-month-old male and female mice)                  | Cre-loxP system  | ON       | 2g/kg dextrose i.p. | n=10 to 20 for each group                       |
| 12 | Lauro et al 1998 (12)          | Insulin receptor (Ins R) and Ins R K1030 mutatnt                    | Cre-loxP system, | ON       | 2g/kg dextrose i.p. | n=8 for each group                              |
| 13 | Mauvais-Jarvis et al 2000 (13) | MIRKO, $\beta$ IRKO and $\beta$ IRKO-MIRKO (2 and 6-month-old mice) | Cre-loxP system  | ON       | 2g/kg dextrose i.p. | n=28 to 32 for each group                       |
| 14 | Micheal et al 2000 (14)        | LIRKO (2 and 6-month-old mice)                                      | Cre-loxP system  | 16 hours | 2g/kg dextrose i.p. | n=8 for each group                              |
| 15 | Wojtaszewski et al 1999 (15)   | MIRKO                                                               | Cre-loxP system  | ON       | 2g/kg dextrose i.p. | n= 7 to 8 for each group                        |
| 16 | Bruening et al 1998 (16)       | MIRKO                                                               | Cre-loxP system  | ON       | 2g/kg dextrose i.p. | n=8 for each group                              |

1089

1090 **Table 2:** Details of the 6 papers used in the Insulin Degrading Enzyme (IDE) inhibition meta-analysis. All studies were carried out on rodent  
 1091 models.

| Sr. No. | Reference                      | Method used to inhibit IDE                                       | Fasting duration before the GTT | Glucose concentration/ mode of glucose infusion used in GTT | Sample size                                |
|---------|--------------------------------|------------------------------------------------------------------|---------------------------------|-------------------------------------------------------------|--------------------------------------------|
| 1       | Villa Perez et al 2018 (17)    | Liver specific IDE knockout                                      | 16 hours                        | 2g/kg dextrose given i.p.                                   | n= 9 to 13 for each group                  |
| 2       | Deprez-Poulain et al 2018 (18) | Inhibition of catalytic site of IDE using the inhibitor BDM44768 | 6 hours                         | 1.5g/kg glucose for IPGTT and 2 or 3g/kg glucose for OGTT   | n= 4 to 7 for each group                   |
| 3       | Durham et al 2015 (19)         | Inhibition of IDE using an N-terminal exosite (NTE)              | ON                              | 2g/kg dextrose given orally                                 | n=6 for each group                         |
| 4       | Maianti et al 2014 (20)        | Inhibition of IDE using a non-catalytic site binding inhibitor   | 14 hours                        | 1.5g/kg glucose for IPGTT and 3g/kg glucose for OGTT        | n=5 to 7 for each group                    |
| 5       | Abdul Hay et al 2011 (21)      | IDE-KO created by Cre-lox recombination                          | 6 to 9 hours                    | 1g/kg dextrose given i.p.                                   | n=10 to 12 for each group                  |
| 6       | Farris et al 2003 (22)         | IDE <sup>-/-</sup> mice created by gene trapping method          | ON                              | 2g/kg dextrose given i.p.                                   | n=6 (IDE <sup>-/-</sup> )<br>n=4 (Control) |

1092

1093 **Table 3:** Details of the 8 papers used in the Diazoxide (DZX) meta-analysis.

| Sr. No.                          | Study reference        | Concentration of diazoxide used | Details of subjects/model                                    | Fasting duration | GTT details                          | Sample size for GTT (placebo, treatment) |
|----------------------------------|------------------------|---------------------------------|--------------------------------------------------------------|------------------|--------------------------------------|------------------------------------------|
| <b>Studies on human subjects</b> |                        |                                 |                                                              |                  |                                      |                                          |
| 1                                | Brauner et al 2016(23) | 3.2 to 4.2 mg/kg/d for 6months  | Children over the age of 6 with hyperinsulinemia and obesity | ON               | 75g glucose given to patients orally | n=12 to 17 for each group                |

|                                 |                               |                                                                                                             |                                                                                                                        |          |                                                           |                                  |
|---------------------------------|-------------------------------|-------------------------------------------------------------------------------------------------------------|------------------------------------------------------------------------------------------------------------------------|----------|-----------------------------------------------------------|----------------------------------|
| 2                               | Ramanathan et al 2011 (24)    | 6mg/kg diazoxide                                                                                            | Healthy, young adults                                                                                                  | ON       | Mixed meal                                                | n=11 for each group              |
| 3                               | Van Boekel et al 2008 (25)    | 50mg t.i.d (thrice in a day) for 4 weeks and then dose increased till 300mg t.i.d, total duration: 6 months | Obese, men, age 30 to 50 years                                                                                         | ON       | Standardized mixed meal                                   | n=18 for each group              |
| 4                               | Due et al 2007 (26)           | 2mg/kg/day DZX or placebo for 8 weeks                                                                       | 35 Overweight and obese men, age 23-54 years                                                                           | ON       | 75g glucose in 300m water given orally                    | n=13 (DZX) and n=18 (placebo)    |
| 5                               | Schreuder et al 2005 (27)     | 50/75/100 mg t.i.d for 6 days                                                                               | Healthy obese and non-obese men, age 30-50 years                                                                       | ON       | Standardized mixed meal                                   | n=5 (non-obese) and n=12 (obese) |
| 6                               | Wigand and Blackard 1979 (28) | 5mg/kg/d, 7 days                                                                                            | Obese, non-diabetic subjects, age 18-33                                                                                | ON       | 40g/m <sup>2</sup> body surface area glucose given orally | n=10                             |
| <b>Studies on rodent models</b> |                               |                                                                                                             |                                                                                                                        |          |                                                           |                                  |
| 7                               | Matsuda et al 2002 (29)       | 30mg/kg/day for 6 weeks                                                                                     | Male Wistar rats, control and STZ induced diabetes                                                                     | 12 hours | 2g/kg glucose i.p                                         | n=7 for each group               |
| 8                               | Leahy et al 1994 (30)         | 30mg/kg/day, twice a day, for 8-12 days                                                                     | Male Sprague-Dawley rats, 3 groups-sham, Pancreatectomised rats treated with water, pancreatectomised rats treated DZX | ON       | 3.5g/kg oral gavage                                       | n=4 for each group               |

1094

1095

1096 **Table 4:** Details of the 10 papers used in the Octreotide (OCT) meta-analysis. All the papers included studies on human subjects.

| Sr. No. | Study reference               | Concentration of octreotide used                                                                                                                                                                                           | Details of subjects/model                                                     | Fasting duration | GTT details              | Sample size for GTT (placebo, treatment) |
|---------|-------------------------------|----------------------------------------------------------------------------------------------------------------------------------------------------------------------------------------------------------------------------|-------------------------------------------------------------------------------|------------------|--------------------------|------------------------------------------|
| 1       | Madsen et al 2011 (31)        | <u>Somatostatin analog (SA) alone:</u><br>Octreotide 10-30mg/4weeks OR<br>Lanreotide 80mg/4weeks<br><u>Co-treatment:</u><br>Octreotide 6.7-20mg/4weeks OR<br>Lanreotide 24-60mg/4weeks<br>AND<br>Pegvisomat 30-60mg/4weeks | 18 Acromegalic patients (age 54±3 years)                                      | ON               | 75g glucose given orally | n=6 SA only<br>n=12 SA+P                 |
| 2       | Breckenbridge et al 2007 (32) | Octreotide (30ng/kg.min) with GH +<br>1. Saline (treatment for our purpose)<br>2. Insulin (control for our purpose)                                                                                                        | 14 Healthy adults (BMI 23 ± 2.9; Age 29 ± 5 years)                            | ON               | 22.5µmol/kg              | n=8 male<br>n=6 female                   |
| 3       | Ronchi et al 2004 (33)        | 1. Lanreotide (Slow Release)-30mg im injection every 14 days for 19±16 months<br>2. Octreotide (Long Acting Release)-20mg im injection every 28 days for 21±10 months                                                      | 10 acromegalic patients (6 men and 4 women; age 46±16 years; BMI 29±5)        | ON               | not mentioned            | n=6 male<br>n=4 female                   |
| 4       | Parkinson et al 2002 (34)     | 1. Octreotide (50µg sc t.i.d) for 7 days<br>2. Pegvisomant (20mg/day sc) for 7 days                                                                                                                                        | 6 healthy, male volunteers (age 21-63 years), studied on 3 separate occasions | ON               | 75g glucose given orally | n=6 male                                 |

|    |                                 |                                                                                                                                             |                                                                                                                         |    |                        |                                 |
|----|---------------------------------|---------------------------------------------------------------------------------------------------------------------------------------------|-------------------------------------------------------------------------------------------------------------------------|----|------------------------|---------------------------------|
| 5  | Giustina et al 1991 (35)        | T2D patients received either of the four treatments<br>a. Insulin 0.1U/kg<br>b. Octreotide 25µg<br>c. Oct 50µg<br>d. Oct 100µg with insulin | 8 overweight/obese T2D patients (age 53.4 ± 4.2 years)                                                                  | ON | Mixed meal             | n=8 (7 female and 1 male)       |
| 6  | Candrina and Giustina 1998 (36) | Type 2 diabetes patients received 0.5U/kg/day divided into 2 subcutaneous injections                                                        | 5 T2D patients (age 56 ± 4 years) duration of diabetes ranged from 13 to 25 years                                       | ON | 300 kcal breakfast     | n=5 (3 male and 2 female)       |
| 7  | Williams et al 1988 (37)        | Type 2 diabetes patients received 50µg OCT, thrice a day, subcutaneously, for 3 days                                                        | 7 T2D patients (age 51-73 years, mean 67 years), duration of diabetes ranged from (6 months to 4 years, mean 2.5 years) | ON | Standardised breakfast | n=7 (4 males and 3 females)     |
| 8  | Johnston et al 1986 (38)        | 50 µg OCT administered subcutaneously, twice a day in diabetic and nondiabetic patients                                                     | 6 normal and 5 type 2 diabetic subjects (age range not given)                                                           | ON | Standardised meals     | n=6 (normal, male)<br>n=5 (T2D) |
| 9  | Davies et al 1986 (39)          | 50 µg OCT administered subcutaneously, twice a day in diabetic patients                                                                     | 5 T2D patients (mean age 49 years; duration of diabetes ranged from 3 to 10 years, with a mean of 6 years)              | ON | Standardised breakfast | n=5 (male, diabetic)            |
| 10 | Williams et al 1986 (40)        | 5-100µg OCT administered subcutaneously in T2D patients twice a day<br>Concentrations used:<br>50 µg in normal<br>5,100 µg in T2D           | 5 normal and 5 T2D patients (age 50 to 65 years)                                                                        | ON | Standardised breakfast | n=5 (normal)<br>n=5 (T2D)       |

1097



1098 **References (Supplementary information 1)**

- 1099 1. Sakaguchi M, Fujisaka S, Cai W, Winnay JN, Konishi M, O'Neill BT, et al. Adipocyte Dynamics and  
1100 Reversible Metabolic Syndrome in Mice with an Inducible Adipocyte-Specific Deletion of the Insulin  
1101 Receptor. *Cell Metab*. 2017;25(2):448–62.
- 1102 2. Softic S, Boucher J, Solheim MH, Fujisaka S, Haering MF, Homan EP, et al. Lipodystrophy due to  
1103 adipose tissue-specific insulin receptor knockout results in progressive NAFLD. *Diabetes*.  
1104 2016;65(8):2187–200.
- 1105 3. Haas JT, Miao J, Chanda D, Wang Y, Zhao E, Haas ME, et al. Hepatic Insulin Signaling Is Required for  
1106 Obesity-Dependent Expression of SREBP-1c mRNA but Not for Feeding-Dependent Expression. *Cell*  
1107 *Metab* [Internet]. 2012 Jun;15(6):873–84. Available from:  
1108 <http://linkinghub.elsevier.com/retrieve/pii/S1550413112001957>
- 1109 4. Kawamori D, Kurpad AJ, Hu J, Liew CW, Shih JL, Ford EL, et al. Insulin Signaling in  $\alpha$  Cells  
1110 Modulates Glucagon Secretion In Vivo. *Cell Metab* [Internet]. 2009 Apr;9(4):350–61. Available from:  
1111 <http://www.ncbi.nlm.nih.gov/pmc/articles/PMC2694613/pdf/nihms109119.pdf>
- 1112 5. Escribano O, Gómez-Hernández A, Díaz-Castroverde S, Nevado C, García G, Otero YF, et al. Insulin  
1113 receptor isoform A confers a higher proliferative capability to pancreatic beta cells enabling glucose  
1114 availability and IGF-I signaling. *Mol Cell Endocrinol*. 2015;
- 1115 6. Ealey KN, Lu S, Lau D, Archer MC. Reduced susceptibility of muscle-specific insulin receptor  
1116 knockout mice to colon carcinogenesis. *Am J Physiol Gastrointest Liver Physiol*. 2008;294(3):G679-86.
- 1117 7. Okada T, Liew CW, Hu J, Hinault C, Michael MD, Krtzfeldt J, et al. Insulin receptors in beta-cells are  
1118 critical for islet compensatory growth response to insulin resistance. *Proc Natl Acad Sci U S A*  
1119 [Internet]. 2007 May 22;104(21):8977–82. Available from:  
1120 <http://www.ncbi.nlm.nih.gov/pubmed/17416680>
- 1121 8. Cohen SE, Tseng Y-H, Michael MD, Kahn CR. Effects of insulin-sensitising agents in mice with  
1122 hepatic insulin resistance. *Diabetologia* [Internet]. 2004 Mar 1;47(3):407–11. Available from:  
1123 <http://link.springer.com/10.1007/s00125-003-1320-4>
- 1124 9. Otani K. Reduced  $\beta$ -cell mass and altered glucose sensing impair insulin-secretory function in IRKO  
1125 mice. *AJP Endocrinol Metab*. 2003;
- 1126 10. Blüher M, Michael MD, Peroni OD, Ueki K, Carter N, Kahn BB, et al. Adipose tissue selective insulin  
1127 receptor knockout protects against obesity and obesity-related glucose intolerance. *Dev Cell*. 2002;
- 1128 11. Guerra C, Navarro P, Valverde AM, Arribas M, Brüning J, Kozak LP, et al. Brown adipose tissue –  
1129 specific insulin receptor knockout shows diabetic phenotype without insulin resistance. *J Clin Invest*.  
1130 2001;108(8):1205–13.
- 1131 12. Lauro D, Kido Y, Castle a L, Zarnowski MJ, Hayashi H, Ebina Y, et al. Impaired glucose tolerance in  
1132 mice with a targeted impairment of insulin action in muscle and adipose tissue. *Nat Genet*.  
1133 1998;20(3):294–8.
- 1134 13. Mauvais-Jarvis F, Virkamaki A, Michael MD, Winnay JN, Zisman A, Kulkarni RN, et al. A model to  
1135 explore the interaction between muscle insulin resistance and beta-cell dysfunction in the development  
1136 of type 2 diabetes. *Diabetes*. 2000;
- 1137 14. Dodson Michael M, Kulkarni RN, Postic C, Previs SF, Shulman GI, Magnuson MA, et al. Loss of  
1138 Insulin Signaling in Hepatocytes Leads to Severe Insulin Resistance and Progressive Hepatic  
1139 Dysfunction. *Mol Cell*. 2000;6:87–97.
- 1140 15. Wojtaszewski JFP, Higaki Y, Hirshman MF, Michael MD, Dufresne SD, Kahn CR, et al. Exercise  
1141 modulates postreceptor insulin signaling and glucose transport in muscle-specific insulin receptor  
1142 knockout mice. *J Clin Invest*. 1999;
- 1143 16. Brüning JC, Michael MD, Winnay JN, Hayashi T, Hörsch D, Accili D, et al. A muscle-specific insulin

- 1144 receptor knockout exhibits features of the metabolic syndrome of NIDDM without altering glucose  
1145 tolerance. *Mol Cell*. 1998;
- 1146 17. Villa-Pérez P, Merino B, Fernández-Díaz CM, Cid P, Lobatón CD, Moreno A, et al. Liver-specific  
1147 ablation of insulin-degrading enzyme causes hepatic insulin resistance and glucose intolerance, without  
1148 affecting insulin clearance in mice. *Metabolism* [Internet]. 2018;88:1–11. Available from:  
1149 <https://www.sciencedirect.com/science/article/pii/S0026049518301690>
- 1150 18. Deprez-Poulain R, Hennuyer N, Bosc D, Liang WG, Enée E, Marechal X, et al. Catalytic site inhibition  
1151 of insulin-degrading enzyme by a small molecule induces glucose intolerance in mice. *Nat Commun*.  
1152 2015;6.
- 1153 19. Durham TB, Toth JL, Klimkowski VJ, Cao JXC, Siesky AM, Alexander-Chacko J, et al. Dual exosite-  
1154 binding inhibitors of insulin-degrading enzyme challenge its role as the primary mediator of insulin  
1155 clearance in vivo. *J Biol Chem*. 2015;290(33):20044–59.
- 1156 20. Maiani JP, McFedries A, Foda ZH, Kleiner RE, Du XQ, Leissring MA, et al. Anti-diabetic activity of  
1157 insulin-degrading enzyme inhibitors mediated by multiple hormones. *Nature* [Internet]. 2014 Jul  
1158 21;511(7507):94–8. Available from: <http://www.nature.com/articles/nature13297>
- 1159 21. Abdul-Hay SO, Kang D, McBride M, Li L, Zhao J, Leissring MA. Deletion of insulin-degrading  
1160 enzyme elicits antipodal, age-dependent effects on glucose and insulin tolerance. *PLoS One* [Internet].  
1161 2011;6(6):e20818. Available from: <http://www.ncbi.nlm.nih.gov/pubmed/21695259>
- 1162 22. Farris W, Mansourian S, Chang Y, Lindsley L, Eckman EA, Frosch MP, et al. Insulin-degrading  
1163 enzyme regulates the levels of insulin, amyloid beta-protein, and the beta-amyloid precursor protein  
1164 intracellular domain in vivo. *Proc Natl Acad Sci U S A* [Internet]. 2003;100(7):4162–7. Available from:  
1165 <http://www.ncbi.nlm.nih.gov/pubmed/12634421>
- 1166 23. Brauner R, Serreau R, Souberbielle JC, Pouillot M, Grouazel S, Recasens C, et al. Diazoxide in children  
1167 with obesity after hypothalamic-pituitary lesions: A randomized, placebo-controlled trial. *J Clin  
1168 Endocrinol Metab*. 2016;101(12):4825–33.
- 1169 24. Ramanathan RP, Arbeláez AM, Cryer PE. Partial inhibition of insulin secretion results in glucose  
1170 intolerance but not hyperglucagonemia. *Diabetes*. 2011;60(4):1324–8.
- 1171 25. van Boekel G, Loves S, van Sorge A, Ruinemans-Koerts J, Rijnders T, de Boer H. Weight loss in obese  
1172 men by caloric restriction and high-dose diazoxide-mediated insulin suppression. *Diabetes, Obes Metab*.  
1173 2008;10(12):1195–203.
- 1174 26. Due A, Flint A, Eriksen G, Møller B, Raben A, Hansen JB, et al. No effect of inhibition of insulin  
1175 secretion by diazoxide on weight loss in hyperinsulinaemic obese subjects during an 8-week weight-loss  
1176 diet. *Diabetes, Obes Metab*. 2007;9(4):566–74.
- 1177 27. Schreuder T, Karreman M, Rennings A, Ruinemans-Koerts J, Jansen M, de Boer H. Diazoxide-  
1178 mediated insulin suppression in obese men: a dose-response study. *Diabetes Obes Metab* [Internet].  
1179 2005 May;7(3):239–45. Available from: <http://www.ncbi.nlm.nih.gov/pubmed/15811140>
- 1180 28. Wigand JP, Blackard WG. Downregulation of insulin receptors in obese man. *Diabetes*.  
1181 1979;28(4):287–91.
- 1182 29. Matsuda M, Kawasaki F, Mikami Y, Takeuchi Y, Saito M, Eto M, et al. Rescue of beta-cell exhaustion  
1183 by diazoxide after the development of diabetes mellitus in rats with streptozotocin-induced diabetes. *Eur  
1184 J Pharmacol*. 2002;453(1):141–8.
- 1185 30. Leahy JL, Bumbalo LM, Chen C. Diazoxide causes recovery of beta-cell glucose responsiveness in 90%  
1186 pancreatectomized diabetic rats. *Diabetes* [Internet]. 1994 Feb;43(2):173–9. Available from:  
1187 <http://doi.wiley.com/10.1046/j.1464-5491.1999.00150.x>
- 1188 31. Madsen M, Poulsen PL, Ørskov H, Møller N, Jørgensen JOL. Cotreatment with pegvisomant and a  
1189 Somatostatin Analog (SA) in SA-responsive acromegalic patients. *J Clin Endocrinol Metab*.  
1190 2011;96(8):2405–13.

- 1191 32. Breckenridge SM, Cooperberg BA, Arbelaez AM, Patterson BW, Cryer PE. Glucagon, in concert with  
1192 insulin, supports the postabsorptive plasma glucose concentration in humans. *Diabetes*.  
1193 2007;56(10):2442–8.
- 1194 33. Ronchi C, Epaminonda P, Cappiello V, Beck-Peccoz P, Arosio M. Effects of two different somatostatin  
1195 analogs on glucose tolerance in acromegaly. *J Endocrinol Invest* [Internet]. 2002 Jun 22;25(6):502–7.  
1196 Available from: <http://link.springer.com/10.1007/BF03345491>
- 1197 34. Parkinson C, Drake WM, Roberts ME, Meeran K, Besser GM, Trainer PJ. A comparison of the effects  
1198 of pegvisomant and octreotide on glucose, insulin, gastrin, cholecystokinin, and pancreatic polypeptide  
1199 responses to oral glucose and a standard mixed meal. *J Clin Endocrinol Metab*. 2002;87(4):1797–804.
- 1200 35. Giustina A, Girelli A, Buffoli MG, Cimino A, Legati F, Valentini U, et al. Low-dose octreotide is able  
1201 to cause a maximal inhibition of the glycemic responses to a mixed meal in obese type 2 diabetic  
1202 patients treated with insulin. *Diabetes Res Clin Pract*. 1991;14(1):47–54.
- 1203 36. Candrina R, Gussago A, Giustina G. Effect of a new long-acting somatostatin analogue (SMS 201–995)  
1204 on glycemic and hormonal response to a mixed meal in acromegalic patients. *J Endocrinol Invest*.  
1205 1988;11(1):21–6.
- 1206 37. Williams G, Fuessl HS, Burrin JM, Chilvers E, Bloom SR. Postprandial glycaemic effects of a long-  
1207 acting somatostatin analogue (octreotide) in non-insulin dependent diabetes mellitus. *Horm Metab Res*.  
1208 1988;20(3):168–70.
- 1209 38. Johnston DG, Davies RR, Alberti KGMM, Miller M, Turner SJ, Watson M, et al. Effects of SMS 201-  
1210 995 on intermediary metabolism and endocrine status in normal and diabetic humans. *Am J Med*.  
1211 1986;81(6 SUPPL. 2):88–93.
- 1212 39. Davies RR, Miller M, Turner SJ, Watson M, McGill A, Orskov H, et al. Effects of somatostatin  
1213 analogue SMS 201-995 in non-insulin-dependent diabetes. *Clin Endocrinol (Oxf)*. 1986;25(6):739–47.
- 1214 40. Williams G, Fuessl H, Kraenzlin M, Bloom SR. Postprandial effects of SMS 201-995 on gut hormones  
1215 and glucose tolerance. *Scand J Gastroenterol*. 1986;21(S119):73–83.
- 1216
- 1217

1218 ***Supplementary information 2***

1219 ***A generalized CSS model to make predictions testable in population data***

1220 A number of models of glucose regulation exist in literature. We use a simple model  
1221 assuming the following. The plasma glucose level  $G$  increases by two processes namely  
1222 absorption from gut and glucose production by the liver. We assume the gut absorption  $Gt$  to  
1223 be independent of standing plasma glucose as well as insulin, whereas liver glucose  
1224 production has a maximum rate  $L$  which has two feedback inhibitors namely direct feedback  
1225 inhibition by glucose and that by standing plasma insulin which depends upon the insulin  
1226 sensitivity of liver. Glucose clearance has two mechanisms namely insulin independent and  
1227 insulin dependent. The plasma insulin  $I$  is a balance between insulin release by pancreatic  
1228 beta cells, the rate being a function of plasma glucose and a rate of insulin degradation which  
1229 is directly proportional to standing plasma insulin level. We assume all relationships to be  
1230 linear and use the model framework of Chawla et al 2018 (1).

$$\frac{dG}{dt} = Gt + L - K_1 \cdot G - I_{SENS} \cdot K_2 \cdot I$$

$$\frac{dI}{dt} = K_3 \cdot G - d \cdot I$$

1231 Where  $K_1$  is a rate constant for glucose uptake by tissues as well as direct feedback inhibition  
1232 of liver glucose production,  $K_2$  a rate constant for insulin mediated inhibition of liver glucose  
1233 production as well as insulin mediated glucose uptake, both of which are assumed to be a  
1234 function of insulin sensitivity  $I_{SENS}$  which is assumed to be unity normally and decreases with  
1235 insulin resistance.  $K_3$  is the rate constant for glucose stimulated insulin secretion and  $d$  the  
1236 rate of insulin clearance.

1237 We use simulations with normally distributed errors to study how the correlation between  
1238 plasma glucose and insulin is affected by the parameters as well as by the standard deviation  
1239 of errors. We use the errors additively or multiplicatively. For simulations using additive  
1240 errors, we add normally distributed error terms  $e_1$  and  $e_2$  to both the equations.

$$\frac{dG}{dt} = L - K_1 \cdot G - I_{SENS} \cdot K_2 \cdot I + e_1$$

1241

$$\frac{dI}{dt} = K_3 \cdot G - d \cdot I + e_2$$

1242

1243 For simulations using multiplicative error, we give normal distributions to  $K_1$ ,  $K_2$ ,  $K_3$  and  
1244  $I_{SENS}$ . Realistic ranges for the parameters are taken from Chawla et al 2018(1).

1245 Simulations show that in a additive error model, as long as the parameters of glucose insulin  
1246 relationship are the same, the regression correlation parameters for glucose insulin  
1247 relationship are not significantly different during fasting steady state ( $Gt=0$ ) and at any time  
1248 post meal ( $Gt > 0$ ). The only difference is in the range of glucose and insulin distribution  
1249 (figure 1)

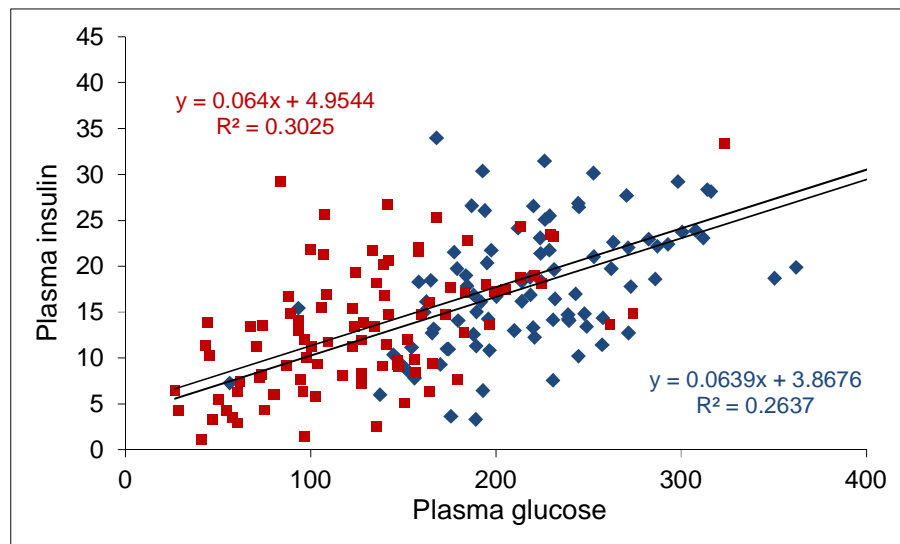

1250

1251 **Figure 1:** The glucose insulin scatter in a fasting steady state (red squares) and in a post meal arbitrary but  
1252 constant time interval (blue diamonds) in an additive error model. A sample result is shown in which  $K_1=0.1$ ,  
1253  $K_2=0.9$ ,  $I_{SENS}$  is randomized between 0.1 and 1 and  $K_3=0.015$  and  $d=0.15$ . The error standard deviations are 15  
1254 and 1 respectively.

1255 In simulations with multiplicative errors, the post meal glucose insulin correlation was  
1256 always weaker than the fasting steady state correlation (figure 2). This is the likely result of  
1257 the errors growing in proportion to larger values of glucose and insulin, and also due to an  
1258 additional variable, gut absorption being incorporated in the model.

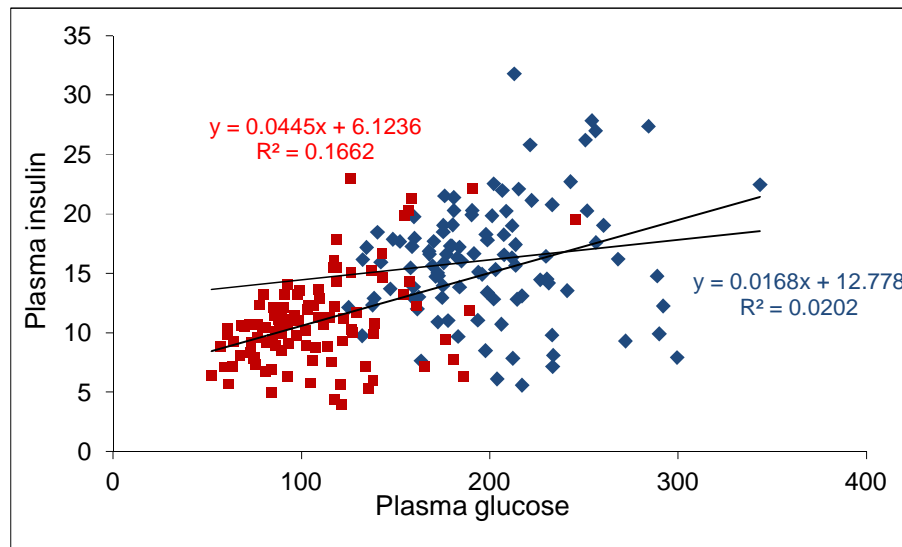

1259

1260 **Figure 2:** The glucose insulin scatter in a fasting steady state (red squares) and at a post meal arbitrary but  
1261 constant time point (blue diamonds) in a multiplicative error model. A sample result is shown in which the mean  
1262 (standard deviations) of the parameters were  $K_1=0.1$  (0.02),  $K_2=0.9$  (0.5),  $I_{SENS}$  is randomized between 0.1 and 1  
1263  $K_3=0.0015$  (0.0002) and  $d=0.15$  (0.005). In all the simulations the correlation coefficient and regression slopes  
1264 of the post meal scatters were less than or equal to the corresponding fasting parameters. This contrasts the  
1265 epidemiological patterns in which the fasting correlations are substantially weaker than the post meal  
1266 correlations (main text Table 7 figure 10).

1267 The results were not sensitive to parameter changes as long as G and I were positive. We can  
1268 confidently make a generalization that as long as the model parameters remain the same, the  
1269 glucose insulin correlation in steady state is stronger or equal to the post meal correlation.  
1270 Logically and intuitively sound, this generalization is unlikely to be specific to a particular  
1271 form of equations based on the assumptions of the CSS class of models.

1272 The simulation results contrast with real life data in which the steady state correlation and  
1273 regression slope between glucose and insulin is observed to be substantially weaker than the  
1274 post meal relations at any point in time. This indicates that the parameters of glucose insulin  
1275 relationship in steady state are substantially different from the post meal parameters, or  
1276 glucose insulin relationship in steady state is qualitatively different from that in the perturbed  
1277 state.

## 1278 **References (Supplementary information 2)**

- 1279 1. Chawla S, Pund A, B. V, Kulkarni S, Diwekar-Joshi M, Watve M. Inferring causal pathways among  
1280 three or more variables from steady-state correlations in a homeostatic system. Ruscica M, editor. PLoS  
1281 One [Internet]. 2018 Oct 11;13(10):e0204755. Available from:  
1282 <http://dx.plos.org/10.1371/journal.pone.0204755>

1283 *Supplementary information 3:*

1284 *1. PRISMA 2009 Checklist for the Insulin Receptor Knockout meta-analysis.*

1285

| Section/topic       | # | Checklist item                                                                                                                                                                                                                                                                                              | Reported on page #                                                                                                  |
|---------------------|---|-------------------------------------------------------------------------------------------------------------------------------------------------------------------------------------------------------------------------------------------------------------------------------------------------------------|---------------------------------------------------------------------------------------------------------------------|
| <b>TITLE</b>        |   |                                                                                                                                                                                                                                                                                                             |                                                                                                                     |
| Title               | 1 | Identify the report as a systematic review, meta-analysis, or both.                                                                                                                                                                                                                                         | Not applicable (NA) since meta-analyses is one of the methods used to address the question and not the only method. |
| <b>ABSTRACT</b>     |   |                                                                                                                                                                                                                                                                                                             |                                                                                                                     |
| Structured summary  | 2 | Provide a structured summary including, as applicable: background; objectives; data sources; study eligibility criteria, participants, and interventions; study appraisal and synthesis methods; results; limitations; conclusions and implications of key findings; systematic review registration number. | 2                                                                                                                   |
| <b>INTRODUCTION</b> |   |                                                                                                                                                                                                                                                                                                             |                                                                                                                     |
| Rationale           | 3 | Describe the rationale for the review in the context of what is already known.                                                                                                                                                                                                                              | Page 5, Line 50                                                                                                     |
| Objectives          | 4 | Provide an explicit statement of questions being addressed with reference to participants, interventions, comparisons, outcomes, and study design (PICOS).                                                                                                                                                  | Page 6                                                                                                              |
| <b>METHODS</b>      |   |                                                                                                                                                                                                                                                                                                             |                                                                                                                     |

|                                    |    |                                                                                                                                                                                                                        |                                                                                                                                                     |
|------------------------------------|----|------------------------------------------------------------------------------------------------------------------------------------------------------------------------------------------------------------------------|-----------------------------------------------------------------------------------------------------------------------------------------------------|
| Protocol and registration          | 5  | Indicate if a review protocol exists, if and where it can be accessed (e.g., Web address), and, if available, provide registration information including registration number.                                          | NA                                                                                                                                                  |
| Eligibility criteria               | 6  | Specify study characteristics (e.g., PICOS, length of follow-up) and report characteristics (e.g., years considered, language, publication status) used as criteria for eligibility, giving rationale.                 | NA                                                                                                                                                  |
| Information sources                | 7  | Describe all information sources (e.g., databases with dates of coverage, contact with study authors to identify additional studies) in the search and date last searched.                                             | Page 7: Table 1;<br>Page 51: Supplementary information 1                                                                                            |
| Search                             | 8  | Present full electronic search strategy for at least one database, including any limits used, such that it could be repeated.                                                                                          | Page 7: Table 1;<br>Page 51-52: Supplementary information 1                                                                                         |
| Study selection                    | 9  | State the process for selecting studies (i.e., screening, eligibility, included in systematic review, and, if applicable, included in the meta-analysis).                                                              | Page 7: Table 1;<br>Page 51-52: Supplementary information 1                                                                                         |
| Data collection process            | 10 | Describe method of data extraction from reports (e.g., piloted forms, independently, in duplicate) and any processes for obtaining and confirming data from investigators.                                             | Data extraction: Page 51: Supplementary information 1<br>No process for obtaining and confirming data from investigators, only published data used. |
| Data items                         | 11 | List and define all variables for which data were sought (e.g., PICOS, funding sources) and any assumptions and simplifications made.                                                                                  | Page 51-52: Supplementary information 1                                                                                                             |
| Risk of bias in individual studies | 12 | Describe methods used for assessing risk of bias of individual studies (including specification of whether this was done at the study or outcome level), and how this information is to be used in any data synthesis. | NA                                                                                                                                                  |



|                               |    |                                                                                                                                                                                                          |                                                                                                                |
|-------------------------------|----|----------------------------------------------------------------------------------------------------------------------------------------------------------------------------------------------------------|----------------------------------------------------------------------------------------------------------------|
| Summary measures              | 13 | State the principal summary measures (e.g., risk ratio, difference in means).                                                                                                                            | Difference in means with the 95% Confidence Intervals of the means. (Page 51-52: Supplementary information 1)  |
| Synthesis of results          | 14 | Describe the methods of handling data and combining results of studies, if done, including measures of consistency (e.g., $I^2$ ) for each meta-analysis.                                                | NA                                                                                                             |
| Risk of bias across studies   | 15 | Specify any assessment of risk of bias that may affect the cumulative evidence (e.g., publication bias, selective reporting within studies).                                                             | NA                                                                                                             |
| Additional analyses           | 16 | Describe methods of additional analyses (e.g., sensitivity or subgroup analyses, meta-regression), if done, indicating which were pre-specified.                                                         | NA                                                                                                             |
| <b>RESULTS</b>                |    |                                                                                                                                                                                                          |                                                                                                                |
| Study selection               | 17 | Give numbers of studies screened, assessed for eligibility, and included in the review, with reasons for exclusions at each stage, ideally with a flow diagram.                                          | Page 7: Table 1;                                                                                               |
| Study characteristics         | 18 | For each study, present characteristics for which data were extracted (e.g., study size, PICOS, follow-up period) and provide the citations.                                                             | Page 51-52: Supplementary information 1                                                                        |
| Risk of bias within studies   | 19 | Present data on risk of bias of each study and, if available, any outcome level assessment (see item 12).                                                                                                | NA                                                                                                             |
| Results of individual studies | 20 | For all outcomes considered (benefits or harms), present, for each study: (a) simple summary data for each intervention group (b) effect estimates and confidence intervals, ideally with a forest plot. | (a) Pages 51 to 52: Supplementary information 1<br>(b) Figures 1 to 4 in the paper<br>(c) Table 2 in the paper |
| Synthesis of results          | 21 | Present results of each meta-analysis done, including confidence intervals and measures of consistency.                                                                                                  | Pages 8-15 in the paper                                                                                        |

|                             |    |                                                                                                                                                                                      |             |
|-----------------------------|----|--------------------------------------------------------------------------------------------------------------------------------------------------------------------------------------|-------------|
| Risk of bias across studies | 22 | Present results of any assessment of risk of bias across studies (see Item 15).                                                                                                      | NA          |
| Additional analysis         | 23 | Give results of additional analyses, if done (e.g., sensitivity or subgroup analyses, meta-regression [see Item 16]).                                                                | NA          |
| <b>DISCUSSION</b>           |    |                                                                                                                                                                                      |             |
| Summary of evidence         | 24 | Summarize the main findings including the strength of evidence for each main outcome; consider their relevance to key groups (e.g., healthcare providers, users, and policy makers). | Pages 37-43 |
| Limitations                 | 25 | Discuss limitations at study and outcome level (e.g., risk of bias), and at review-level (e.g., incomplete retrieval of identified research, reporting bias).                        | Pages 37-43 |
| Conclusions                 | 26 | Provide a general interpretation of the results in the context of other evidence, and implications for future research.                                                              | Pages 37-43 |
| <b>FUNDING</b>              |    |                                                                                                                                                                                      |             |
| Funding                     | 27 | Describe sources of funding for the systematic review and other support (e.g., supply of data); role of funders for the systematic review.                                           | Page 43     |

1286

1287

1288

1289

1290

2. *PRISMA 2009 Checklist for the Insulin Degrading Enzyme meta-analysis.*

| Section/topic             | # | Checklist item                                                                                                                                                                                                                                                                                              | Reported on page #                                                                                                  |
|---------------------------|---|-------------------------------------------------------------------------------------------------------------------------------------------------------------------------------------------------------------------------------------------------------------------------------------------------------------|---------------------------------------------------------------------------------------------------------------------|
| <b>TITLE</b>              |   |                                                                                                                                                                                                                                                                                                             |                                                                                                                     |
| Title                     | 1 | Identify the report as a systematic review, meta-analysis, or both.                                                                                                                                                                                                                                         | Not applicable (NA) since meta-analyses is one of the methods used to address the question and not the only method. |
| <b>ABSTRACT</b>           |   |                                                                                                                                                                                                                                                                                                             |                                                                                                                     |
| Structured summary        | 2 | Provide a structured summary including, as applicable: background; objectives; data sources; study eligibility criteria, participants, and interventions; study appraisal and synthesis methods; results; limitations; conclusions and implications of key findings; systematic review registration number. | 2                                                                                                                   |
| <b>INTRODUCTION</b>       |   |                                                                                                                                                                                                                                                                                                             |                                                                                                                     |
| Rationale                 | 3 | Describe the rationale for the review in the context of what is already known.                                                                                                                                                                                                                              | 5, Line 50                                                                                                          |
| Objectives                | 4 | Provide an explicit statement of questions being addressed with reference to participants, interventions, comparisons, outcomes, and study design (PICOS).                                                                                                                                                  | Pages 16-17                                                                                                         |
| <b>METHODS</b>            |   |                                                                                                                                                                                                                                                                                                             |                                                                                                                     |
| Protocol and registration | 5 | Indicate if a review protocol exists, if and where it can be accessed (e.g., Web address), and, if available, provide registration information including registration number.                                                                                                                               | NA                                                                                                                  |
| Eligibility criteria      | 6 | Specify study characteristics (e.g., PICOS, length of follow-up) and report characteristics (e.g., years considered,                                                                                                                                                                                        | NA                                                                                                                  |

|                                    |    |                                                                                                                                                                                                                        |                                                                                                                                                     |
|------------------------------------|----|------------------------------------------------------------------------------------------------------------------------------------------------------------------------------------------------------------------------|-----------------------------------------------------------------------------------------------------------------------------------------------------|
|                                    |    | language, publication status) used as criteria for eligibility, giving rationale.                                                                                                                                      |                                                                                                                                                     |
| Information sources                | 7  | Describe all information sources (e.g., databases with dates of coverage, contact with study authors to identify additional studies) in the search and date last searched.                                             | Pages 16-18: Table 3,<br>Page 50,53: Supplementary information 1                                                                                    |
| Search                             | 8  | Present full electronic search strategy for at least one database, including any limits used, such that it could be repeated.                                                                                          | Pages 16-17: Table 3,<br>Page 50,53: Supplementary information 1                                                                                    |
| Study selection                    | 9  | State the process for selecting studies (i.e., screening, eligibility, included in systematic review, and, if applicable, included in the meta-analysis).                                                              | Pages 16-17: Table 3,<br>Page 50,53: Supplementary information 1                                                                                    |
| Data collection process            | 10 | Describe method of data extraction from reports (e.g., piloted forms, independently, in duplicate) and any processes for obtaining and confirming data from investigators.                                             | Data extraction: Page 50: Supplementary information 1<br>No process for obtaining and confirming data from investigators, only published data used. |
| Data items                         | 11 | List and define all variables for which data were sought (e.g., PICOS, funding sources) and any assumptions and simplifications made.                                                                                  | Page 50: Supplementary information 1                                                                                                                |
| Risk of bias in individual studies | 12 | Describe methods used for assessing risk of bias of individual studies (including specification of whether this was done at the study or outcome level), and how this information is to be used in any data synthesis. | NA                                                                                                                                                  |
| Summary measures                   | 13 | State the principal summary measures (e.g., risk ratio, difference in means).                                                                                                                                          | Difference in means with the 95% Confidence Intervals of the means. (Page 50: Supplementary information 1)                                          |
| Synthesis of results               | 14 | Describe the methods of handling data and combining results of studies, if done, including measures of consistency (e.g.,                                                                                              | NA                                                                                                                                                  |

|                               |    |                                                                                                                                                                                                          |                                                                                                    |
|-------------------------------|----|----------------------------------------------------------------------------------------------------------------------------------------------------------------------------------------------------------|----------------------------------------------------------------------------------------------------|
|                               |    | $I^2$ ) for each meta-analysis.                                                                                                                                                                          |                                                                                                    |
| Risk of bias across studies   | 15 | Specify any assessment of risk of bias that may affect the cumulative evidence (e.g., publication bias, selective reporting within studies).                                                             | NA                                                                                                 |
| Additional analyses           | 16 | Describe methods of additional analyses (e.g., sensitivity or subgroup analyses, meta-regression), if done, indicating which were pre-specified.                                                         | NA                                                                                                 |
| <b>RESULTS</b>                |    |                                                                                                                                                                                                          |                                                                                                    |
| Study selection               | 17 | Give numbers of studies screened, assessed for eligibility, and included in the review, with reasons for exclusions at each stage, ideally with a flow diagram.                                          | Pages 16-17: Table 3,                                                                              |
| Study characteristics         | 18 | For each study, present characteristics for which data were extracted (e.g., study size, PICOS, follow-up period) and provide the citations.                                                             | Page 53: Supplementary information 1, Table 2                                                      |
| Risk of bias within studies   | 19 | Present data on risk of bias of each study and, if available, any outcome level assessment (see item 12).                                                                                                | NA                                                                                                 |
| Results of individual studies | 20 | For all outcomes considered (benefits or harms), present, for each study: (a) simple summary data for each intervention group (b) effect estimates and confidence intervals, ideally with a forest plot. | (a) Pages 53: Supplementary information 1<br>(b) Figure 5 in the paper<br>(c) Table 4 in the paper |
| Synthesis of results          | 21 | Present results of each meta-analysis done, including confidence intervals and measures of consistency.                                                                                                  | Pages 18- 20 in the paper<br>Figure 5 in the paper<br>Table 4 in the paper                         |
| Risk of bias across studies   | 22 | Present results of any assessment of risk of bias across studies (see Item 15).                                                                                                                          | NA                                                                                                 |

|                     |    |                                                                                                                                                                                      |             |
|---------------------|----|--------------------------------------------------------------------------------------------------------------------------------------------------------------------------------------|-------------|
| Additional analysis | 23 | Give results of additional analyses, if done (e.g., sensitivity or subgroup analyses, meta-regression [see Item 16]).                                                                | NA          |
| <b>DISCUSSION</b>   |    |                                                                                                                                                                                      |             |
| Summary of evidence | 24 | Summarize the main findings including the strength of evidence for each main outcome; consider their relevance to key groups (e.g., healthcare providers, users, and policy makers). | Pages 37-43 |
| Limitations         | 25 | Discuss limitations at study and outcome level (e.g., risk of bias), and at review-level (e.g., incomplete retrieval of identified research, reporting bias).                        | Pages 37-43 |
| Conclusions         | 26 | Pages 37-43                                                                                                                                                                          | Pages 37-43 |
| <b>FUNDING</b>      |    |                                                                                                                                                                                      |             |
| Funding             | 27 | Describe sources of funding for the systematic review and other support (e.g., supply of data); role of funders for the systematic review.                                           | Page 43     |

1292

1293

### 3. PRISMA 2009 Checklist for the Insulin Suppression by Diazoxide meta-analysis.

| Section/topic             | # | Checklist item                                                                                                                                                                                                                                                                                              | Reported on page #                                                                                                  |
|---------------------------|---|-------------------------------------------------------------------------------------------------------------------------------------------------------------------------------------------------------------------------------------------------------------------------------------------------------------|---------------------------------------------------------------------------------------------------------------------|
| <b>TITLE</b>              |   |                                                                                                                                                                                                                                                                                                             |                                                                                                                     |
| Title                     | 1 | Identify the report as a systematic review, meta-analysis, or both.                                                                                                                                                                                                                                         | Not applicable (NA) since meta-analyses is one of the methods used to address the question and not the only method. |
| <b>ABSTRACT</b>           |   |                                                                                                                                                                                                                                                                                                             |                                                                                                                     |
| Structured summary        | 2 | Provide a structured summary including, as applicable: background; objectives; data sources; study eligibility criteria, participants, and interventions; study appraisal and synthesis methods; results; limitations; conclusions and implications of key findings; systematic review registration number. | 2                                                                                                                   |
| <b>INTRODUCTION</b>       |   |                                                                                                                                                                                                                                                                                                             |                                                                                                                     |
| Rationale                 | 3 | Describe the rationale for the review in the context of what is already known.                                                                                                                                                                                                                              | 5, Line 50                                                                                                          |
| Objectives                | 4 | Provide an explicit statement of questions being addressed with reference to participants, interventions, comparisons, outcomes, and study design (PICOS).                                                                                                                                                  | Pages 15-17                                                                                                         |
| <b>METHODS</b>            |   |                                                                                                                                                                                                                                                                                                             |                                                                                                                     |
| Protocol and registration | 5 | Indicate if a review protocol exists, if and where it can be accessed (e.g., Web address), and, if available, provide registration information including registration number.                                                                                                                               | NA                                                                                                                  |
| Eligibility criteria      | 6 | Specify study characteristics (e.g., PICOS, length of follow-up) and report characteristics (e.g., years considered,                                                                                                                                                                                        | NA                                                                                                                  |

|                                    |    |                                                                                                                                                                                                                        |                                                                                                                                                     |
|------------------------------------|----|------------------------------------------------------------------------------------------------------------------------------------------------------------------------------------------------------------------------|-----------------------------------------------------------------------------------------------------------------------------------------------------|
|                                    |    | language, publication status) used as criteria for eligibility, giving rationale.                                                                                                                                      |                                                                                                                                                     |
| Information sources                | 7  | Describe all information sources (e.g., databases with dates of coverage, contact with study authors to identify additional studies) in the search and date last searched.                                             | Page 50,53,54 : Supplementary information 1, Table 3                                                                                                |
| Search                             | 8  | Present full electronic search strategy for at least one database, including any limits used, such that it could be repeated.                                                                                          | Pages 20-21, Table 5 in the paper<br>Pages 50,53 and 54 in the Supplementary information 1, Table 3                                                 |
| Study selection                    | 9  | State the process for selecting studies (i.e., screening, eligibility, included in systematic review, and, if applicable, included in the meta-analysis).                                                              | Pages 20-21, Table 5 in the paper<br>Pages 50,53 and 54 in the Supplementary information 1, Table 3                                                 |
| Data collection process            | 10 | Describe method of data extraction from reports (e.g., piloted forms, independently, in duplicate) and any processes for obtaining and confirming data from investigators.                                             | Data extraction: Page 50: Supplementary information 1<br>No process for obtaining and confirming data from investigators, only published data used. |
| Data items                         | 11 | List and define all variables for which data were sought (e.g., PICOS, funding sources) and any assumptions and simplifications made.                                                                                  | Page 50: Supplementary information 1                                                                                                                |
| Risk of bias in individual studies | 12 | Describe methods used for assessing risk of bias of individual studies (including specification of whether this was done at the study or outcome level), and how this information is to be used in any data synthesis. | NA                                                                                                                                                  |
| Summary measures                   | 13 | State the principal summary measures (e.g., risk ratio, difference in means).                                                                                                                                          | Difference in means with the 95% Confidence Intervals of the means. (Page 50: Supplementary information 1)                                          |
| Synthesis of results               | 14 | Describe the methods of handling data and combining results of studies, if done, including measures of consistency (e.g.,                                                                                              | NA                                                                                                                                                  |



|                               |    |                                                                                                                                                                                                          |                                                                                                                                     |
|-------------------------------|----|----------------------------------------------------------------------------------------------------------------------------------------------------------------------------------------------------------|-------------------------------------------------------------------------------------------------------------------------------------|
|                               |    | $I^2$ ) for each meta-analysis.                                                                                                                                                                          |                                                                                                                                     |
| Risk of bias across studies   | 15 | Specify any assessment of risk of bias that may affect the cumulative evidence (e.g., publication bias, selective reporting within studies).                                                             | NA                                                                                                                                  |
| Additional analyses           | 16 | Describe methods of additional analyses (e.g., sensitivity or subgroup analyses, meta-regression), if done, indicating which were pre-specified.                                                         | NA                                                                                                                                  |
| <b>RESULTS</b>                |    |                                                                                                                                                                                                          |                                                                                                                                     |
| Study selection               | 17 | Give numbers of studies screened, assessed for eligibility, and included in the review, with reasons for exclusions at each stage, ideally with a flow diagram.                                          | Pages 20-21, Table 5 in the paper<br>Pages 50,53 and 54 in the Supplementary information 1, Table 3                                 |
| Study characteristics         | 18 | For each study, present characteristics for which data were extracted (e.g., study size, PICOS, follow-up period) and provide the citations.                                                             | Page 50: Supplementary information 1                                                                                                |
| Risk of bias within studies   | 19 | Present data on risk of bias of each study and, if available, any outcome level assessment (see item 12).                                                                                                | NA                                                                                                                                  |
| Results of individual studies | 20 | For all outcomes considered (benefits or harms), present, for each study: (a) simple summary data for each intervention group (b) effect estimates and confidence intervals, ideally with a forest plot. | (a) Pages 53 to 54: Supplementary information 1, Table 3<br>(b) Page 22, Table 6 in the paper<br>(c) Page 23, Figure 6 in the paper |
| Synthesis of results          | 21 | Present results of each meta-analysis done, including confidence intervals and measures of consistency.                                                                                                  | Pages 22,23                                                                                                                         |
| Risk of bias across studies   | 22 | Present results of any assessment of risk of bias across studies (see Item 15).                                                                                                                          | NA                                                                                                                                  |
| Additional analysis           | 23 | Give results of additional analyses, if done (e.g., sensitivity or subgroup analyses, meta-regression [see Item 16]).                                                                                    | NA                                                                                                                                  |

| <b>DISCUSSION</b>   |    |                                                                                                                                                                                      |             |
|---------------------|----|--------------------------------------------------------------------------------------------------------------------------------------------------------------------------------------|-------------|
| Summary of evidence | 24 | Summarize the main findings including the strength of evidence for each main outcome; consider their relevance to key groups (e.g., healthcare providers, users, and policy makers). | Pages 37-43 |
| Limitations         | 25 | Discuss limitations at study and outcome level (e.g., risk of bias), and at review-level (e.g., incomplete retrieval of identified research, reporting bias).                        | Pages 37-43 |
| Conclusions         | 26 | Provide a general interpretation of the results in the context of other evidence, and implications for future research.                                                              | Page 37-43  |
| <b>FUNDING</b>      |    |                                                                                                                                                                                      |             |
| Funding             | 27 | Describe sources of funding for the systematic review and other support (e.g., supply of data); role of funders for the systematic review.                                           | Page 43     |

1295

1296

**4. PRISMA 2009 Checklist for the Insulin Suppression by Octreotide meta-analysis.**

| Section/topic   | # | Checklist item                                                      | Reported on page #                                                                                                  |
|-----------------|---|---------------------------------------------------------------------|---------------------------------------------------------------------------------------------------------------------|
| <b>TITLE</b>    |   |                                                                     |                                                                                                                     |
| Title           | 1 | Identify the report as a systematic review, meta-analysis, or both. | Not applicable (NA) since meta-analyses is one of the methods used to address the question and not the only method. |
| <b>ABSTRACT</b> |   |                                                                     |                                                                                                                     |

|                           |   |                                                                                                                                                                                                                                                                                                             |                                                                                           |
|---------------------------|---|-------------------------------------------------------------------------------------------------------------------------------------------------------------------------------------------------------------------------------------------------------------------------------------------------------------|-------------------------------------------------------------------------------------------|
| Structured summary        | 2 | Provide a structured summary including, as applicable: background; objectives; data sources; study eligibility criteria, participants, and interventions; study appraisal and synthesis methods; results; limitations; conclusions and implications of key findings; systematic review registration number. | 2                                                                                         |
| <b>INTRODUCTION</b>       |   |                                                                                                                                                                                                                                                                                                             |                                                                                           |
| Rationale                 | 3 | Describe the rationale for the review in the context of what is already known.                                                                                                                                                                                                                              | 5, Line 50                                                                                |
| Objectives                | 4 | Provide an explicit statement of questions being addressed with reference to participants, interventions, comparisons, outcomes, and study design (PICOS).                                                                                                                                                  | Pages 15-17                                                                               |
| <b>METHODS</b>            |   |                                                                                                                                                                                                                                                                                                             |                                                                                           |
| Protocol and registration | 5 | Indicate if a review protocol exists, if and where it can be accessed (e.g., Web address), and, if available, provide registration information including registration number.                                                                                                                               | NA                                                                                        |
| Eligibility criteria      | 6 | Specify study characteristics (e.g., PICOS, length of follow-up) and report characteristics (e.g., years considered, language, publication status) used as criteria for eligibility, giving rationale.                                                                                                      | NA                                                                                        |
| Information sources       | 7 | Describe all information sources (e.g., databases with dates of coverage, contact with study authors to identify additional studies) in the search and date last searched.                                                                                                                                  | Page 50,55,56 : Supplementary information 1, Table 4                                      |
| Search                    | 8 | Present full electronic search strategy for at least one database, including any limits used, such that it could be repeated.                                                                                                                                                                               | Pages 20-21 in the paper, Table 5<br>Page 50,55,56 : Supplementary information 1, Table 4 |
| Study selection           | 9 | State the process for selecting studies (i.e., screening, eligibility, included in systematic review, and, if applicable,                                                                                                                                                                                   | Pages 20-21 in the paper, Table 5<br>Page 50,55,56 : Supplementary                        |

|                                    |    |                                                                                                                                                                                                                        |                                                                                                                                                     |
|------------------------------------|----|------------------------------------------------------------------------------------------------------------------------------------------------------------------------------------------------------------------------|-----------------------------------------------------------------------------------------------------------------------------------------------------|
|                                    |    | included in the meta-analysis).                                                                                                                                                                                        | information 1, Table 4                                                                                                                              |
| Data collection process            | 10 | Describe method of data extraction from reports (e.g., piloted forms, independently, in duplicate) and any processes for obtaining and confirming data from investigators.                                             | Data extraction: Page 50: Supplementary information 1<br>No process for obtaining and confirming data from investigators, only published data used. |
| Data items                         | 11 | List and define all variables for which data were sought (e.g., PICOS, funding sources) and any assumptions and simplifications made.                                                                                  | Page 50: Supplementary information 1                                                                                                                |
| Risk of bias in individual studies | 12 | Describe methods used for assessing risk of bias of individual studies (including specification of whether this was done at the study or outcome level), and how this information is to be used in any data synthesis. | NA                                                                                                                                                  |
| Summary measures                   | 13 | State the principal summary measures (e.g., risk ratio, difference in means).                                                                                                                                          | Difference in means with the 95% Confidence Intervals of the means. (Page 50: Supplementary information 1)                                          |
| Synthesis of results               | 14 | Describe the methods of handling data and combining results of studies, if done, including measures of consistency (e.g., $I^2$ ) for each meta-analysis.                                                              | NA                                                                                                                                                  |
| Risk of bias across studies        | 15 | Specify any assessment of risk of bias that may affect the cumulative evidence (e.g., publication bias, selective reporting within studies).                                                                           | NA                                                                                                                                                  |
| Additional analyses                | 16 | Describe methods of additional analyses (e.g., sensitivity or subgroup analyses, meta-regression), if done, indicating which were pre-specified.                                                                       | NA                                                                                                                                                  |
| <b>RESULTS</b>                     |    |                                                                                                                                                                                                                        |                                                                                                                                                     |

|                               |    |                                                                                                                                                                                                          |                                                                                                                                     |
|-------------------------------|----|----------------------------------------------------------------------------------------------------------------------------------------------------------------------------------------------------------|-------------------------------------------------------------------------------------------------------------------------------------|
| Study selection               | 17 | Give numbers of studies screened, assessed for eligibility, and included in the review, with reasons for exclusions at each stage, ideally with a flow diagram.                                          | Pages 20-21, Table 5 in the paper<br>Pages 50, 55 and 56 in the Supplementary information 1, Table 4                                |
| Study characteristics         | 18 | For each study, present characteristics for which data were extracted (e.g., study size, PICOS, follow-up period) and provide the citations.                                                             | Page 52: Supplementary information 1                                                                                                |
| Risk of bias within studies   | 19 | Present data on risk of bias of each study and, if available, any outcome level assessment (see item 12).                                                                                                | NA                                                                                                                                  |
| Results of individual studies | 20 | For all outcomes considered (benefits or harms), present, for each study: (a) simple summary data for each intervention group (b) effect estimates and confidence intervals, ideally with a forest plot. | (a) Pages 55 to 56: Supplementary information 1, Table 4<br>(b) Page 22, Table 6 in the paper<br>(c) Page 23, Figure 6 in the paper |
| Synthesis of results          | 21 | Present results of each meta-analysis done, including confidence intervals and measures of consistency.                                                                                                  | Pages 22,23 in the paper                                                                                                            |
| Risk of bias across studies   | 22 | Present results of any assessment of risk of bias across studies (see Item 15).                                                                                                                          | NA                                                                                                                                  |
| Additional analysis           | 23 | Give results of additional analyses, if done (e.g., sensitivity or subgroup analyses, meta-regression [see Item 16]).                                                                                    | NA                                                                                                                                  |
| <b>DISCUSSION</b>             |    |                                                                                                                                                                                                          |                                                                                                                                     |
| Summary of evidence           | 24 | Summarize the main findings including the strength of evidence for each main outcome; consider their relevance to key groups (e.g., healthcare providers, users, and policy makers).                     | Pages 37-43                                                                                                                         |
| Limitations                   | 25 | Discuss limitations at study and outcome level (e.g., risk of bias), and at review-level (e.g., incomplete retrieval of identified research, reporting bias).                                            | Pages 37-43                                                                                                                         |

|                |    |                                                                                                                                            |            |
|----------------|----|--------------------------------------------------------------------------------------------------------------------------------------------|------------|
| Conclusions    | 26 | Provide a general interpretation of the results in the context of other evidence, and implications for future research.                    | Page 37-43 |
| <b>FUNDING</b> |    |                                                                                                                                            |            |
| Funding        | 27 | Describe sources of funding for the systematic review and other support (e.g., supply of data); role of funders for the systematic review. | Page 43    |

1297

1298  
1299  
1300

From: Moher D, Liberati A, Tetzlaff J, Altman DG, The PRISMA Group (2009). Preferred Reporting Items for Systematic Reviews and Meta-Analyses: The PRISMA Statement. PLoS Med 6(7): e1000097. doi:10.1371/journal.pmed1000097

For more information, visit: [www.prisma-statement.org](http://www.prisma-statement.org).
